# Supplementary material for: Pd-Promoted cross coupling of iodobenzene with vinylgold via an unprecedented phenyl transmetalation from Pd to Au
Source: Royal Society of Chemistry journal article supplement (doi:10.1039/d0cc02645j), 2020-01-01
Supplement: d0cc02645j1.pdf [file d0cc02645j1.pdf]

**Electronic Supplementary Information**

**Pd-promoted cross coupling of iodobenzene with vinylgold via an  
unprecedented phenyl transmetalation from Pd to Au**

Jiwei Wang,<sup>‡a</sup> Licheng Zhan,<sup>‡a</sup> Gendi Wang,<sup>a</sup> Yin Wei,<sup>b</sup> Min Shi<sup>ab</sup> and Jun Zhang<sup>\*a</sup>

<sup>a</sup>Key Laboratory for Advanced Materials and Joint International Research Laboratory of Precision Chemistry and Molecular Engineering, Feringa Nobel Prize Scientist Joint Research Center, School of Chemistry and Molecular Engineering, East China University of Science and Technology, 130 Meilong Road, Shanghai 200237, China

<sup>b</sup>State Key Laboratory of Organometallic Chemistry, Shanghai Institute of Organic Chemistry, Chinese Academy of Sciences, 354 Fenglin Road, Shanghai 200032 China

## Table of Contents

|                                                                                                                                    |     |
|------------------------------------------------------------------------------------------------------------------------------------|-----|
| General Methods.....                                                                                                               | S3  |
| Preparation and characterization.....                                                                                              | S3  |
| Synthesis of compound <b>1</b> .....                                                                                               | S3  |
| Synthesis of complex <b>2</b> .....                                                                                                | S4  |
| Synthesis of complex <b>3</b> .....                                                                                                | S4  |
| Synthesis of complex <b>4</b> .....                                                                                                | S5  |
| Synthesis of complex <b>5</b> .....                                                                                                | S6  |
| Synthesis of complex <b>6</b> .....                                                                                                | S7  |
| Synthesis of complex <b>7</b> .....                                                                                                | S7  |
| Synthesis of complex <b>8</b> .....                                                                                                | S8  |
| Synthesis of complex <b>9</b> .....                                                                                                | S9  |
| Synthesis of compound <b>10</b> .....                                                                                              | S10 |
| Reaction of complex <b>3</b> with PhI in the presence of Pd(CH <sub>3</sub> CN) <sub>4</sub> (BF <sub>4</sub> ) <sub>2</sub> ..... | S10 |
| Reaction of complex <b>3</b> with PhB(OH) <sub>2</sub> in the presence of Pd(PPh <sub>3</sub> ) <sub>2</sub> Cl <sub>2</sub> ..... | S10 |
| Testing the stability of <b>5</b> in acetonitrile at 110°C .....                                                                   | S10 |
| References.....                                                                                                                    | S10 |
| NMR Spectra .....                                                                                                                  | S11 |
| X-Ray Crystallography .....                                                                                                        | S26 |
| Computational Details.....                                                                                                         | S29 |

## General Methods

Unless otherwise stated, all reactions and manipulations were performed using standard Schlenk techniques. All solvents were purified by distillation using standard methods. Commercially available reagents were used without further purification. NMR spectra were recorded by using a Bruker 400 MHz spectrometer. Chemical shifts are reported in ppm from tetramethylsilane with the solvent resonance as the internal standard ( $^1\text{H}$  NMR  $\text{CDCl}_3$ : 7.26 ppm;  $^{13}\text{C}$  NMR  $\text{CDCl}_3$ : 77.0 ppm;  $^{13}\text{C}$  NMR DMSO: 39.43 ppm). Mass spectra were recorded on the HP-5989 instrument by EI/ESI methods. X-ray diffraction analysis was performed by using a Bruker Smart-1000X-ray diffractometer.

Trimethylsilyl acetylene, 2,6-diisopropylaniline and 2-bromoisophthalaldehyde are commercially available and were used as received without further purification. 2-(trimethylsilyl)ethynylbenzaldehyde,<sup>1</sup> 2-(phenylethynyl) isophthalaldehyde,<sup>2</sup>  $\text{IPrAuCl}$ ,<sup>3</sup>  $\text{Pd}(\text{CH}_3\text{CN})_4(\text{BF}_4)_2$ <sup>4</sup> and  $[\text{PCP}]\text{PdCl}$ <sup>5</sup> was synthesized by the procedures previously reported.

## Preparation and characterization

### Synthesis of complex 1

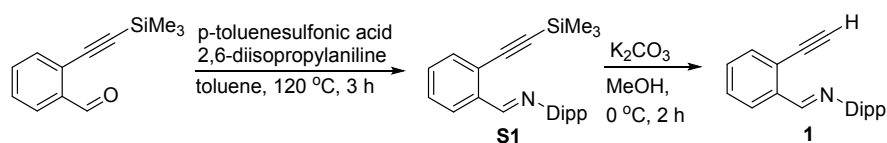

**Scheme S1.** The synthetic route for the preparation of terminal alkynyl **1**.

A mixture of 2-(trimethylsilyl)ethynylbenzaldehyde (500 mg, 2.47 mmol), *p*-toluenesulfonic acid (43 mg, 0.25 mmol) and 2,6-diisopropylaniline (525 mg, 2.96 mmol) was refluxed in the toluene (15 mL) at 120 °C for 3 h. The mixture was then filtered and all volatiles were removed under reduced pressure. The residue was washed with methanol and filtered to afford **S1** as a yellow solid (829 mg, 93%).

**S1** (500 mg, 1.38 mmol) was dissolved in methanol (20 mL), potassium carbonate (478 mg, 3.46 mmol) was added, and then the mixture was stirred at 0 °C for 2 h. All volatiles were removed under reduced pressure and dissolved in DCM. The mixture was filtered through Celite and the filtrate was concentrated to afford **1** as a pale yellow solid (367 mg, 92%).  $^1\text{H}$  NMR (400 MHz,  $\text{CDCl}_3$ )  $\delta$  = 8.84 (s, 1H), 8.39 (d,  $J$  = 7.2 Hz, 1H), 7.67 (d,  $J$  = 7.2 Hz, 1H), 7.59-7.47 (m, 2H), 7.29-7.27 (m, 1H), 7.25-7.17 (m, 2H), 3.36 (s, 1H), 3.15-3.03 (m, 2H), 1.28 (d,  $J$  = 6.8 Hz, 12H).  $^{13}\text{C}$  NMR (100 MHz,  $\text{CDCl}_3$ )  $\delta$  = 160.76, 149.16, 137.65, 137.36, 133.14, 130.80, 129.21, 126.24, 124.26, 123.69, 123.04, 83.19, 80.35, 27.90, 23.55. HRMS (ESI):  $m/z$   $[\text{M}+\text{H}]^+$  calcd. for  $\text{C}_{21}\text{H}_{24}\text{N}^+$ : 290.1909; found: 290.1906.

### Synthesis of complex 2

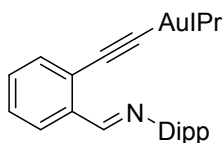

In a nitrogen-filled round-bottom flask, a solution of **1** (200 mg, 0.69 mmol) in THF (6 mL) was cooled to  $-78\text{ }^{\circ}\text{C}$ , and *n*-butyllithium (1.6 M in THF, 0.52 mL, 0.83 mmol) was added dropwise. After stirring 10 min, IPrAuCl (428 mg, 0.69 mmol) was added. The solution was then warmed to room temperature. After 4 h at room temperature, the mixture was filtered and all volatiles were removed under reduced pressure, the crude product was purified by column chromatography using neutral aluminum oxide (v/v, PE/ EtOAc = 80:1) to afford pure **2** as a yellow solid (314 mg, 52%).  $^1\text{H}$  NMR (400 MHz,  $\text{CDCl}_3$ )  $\delta$  = 8.72 (s, 1H), 8.10 (d,  $J$  = 7.2 Hz, 1H), 7.43 (t,  $J$  = 7.6 Hz, 2H), 7.37 (d,  $J$  = 7.2 Hz, 1H), 7.24-7.20 (m, 5H), 7.19-7.12 (m, 4H), 7.10 (s, 2H), 2.99-2.85 (m, 2H), 2.60-2.45 (m, 4H), 1.24 (d,  $J$  = 6.8 Hz, 12H), 1.19 (d,  $J$  = 6.8 Hz, 12H), 1.10 (d,  $J$  = 6.8 Hz, 12H).  $^{13}\text{C}$  NMR (100 MHz,  $\text{CDCl}_3$ )  $\delta$  = 190.59, 162.94, 149.77, 145.46, 137.75, 137.08, 136.64, 134.03, 132.76, 130.29, 128.28, 125.92, 125.38, 124.00, 123.43, 123.07, 122.60, 99.88, 28.64, 27.64, 24.37, 23.87, 23.62. Anal. calcd. for  $\text{C}_{48}\text{H}_{58}\text{AuN}_3$  (1.25  $\text{CH}_2\text{Cl}_2$ ): C, 60.35; H, 6.22; N, 4.29; found: C, 60.68; H, 6.60; N, 4.32.

### Synthesis of complex 3

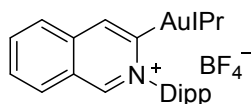

Complex **1** (100 mg, 0.11 mmol) and  $\text{Pd}(\text{CH}_3\text{CN})_4(\text{BF}_4)_2$  (62 mg, 0.14 mmol) was dissolved in the DCM (2 mL). After stirring at  $25\text{ }^{\circ}\text{C}$  for 10 min, the mixture was filtered, and all volatiles were removed under reduced pressure to give the crude product, which was washed with  $\text{Et}_2\text{O}$  and dried to afford pure **3** as a yellow solid (72 mg, 68%).  $^1\text{H}$  NMR (400 MHz,  $\text{CDCl}_3$ )  $\delta$  = 9.05 (s, 1H), 8.18 (d,  $J$  = 8.4 Hz, 1H), 8.01 (t,  $J$  = 8.4 Hz, 1H), 7.84 (d,  $J$  = 8.4 Hz, 1H), 7.77 (s, 1H), 7.74 (t,  $J$  = 7.2 Hz, 1H), 7.41 (t,  $J$  = 7.8 Hz, 2H), 7.31 (t,  $J$  = 7.8 Hz, 1H), 7.23 (d,  $J$  = 11.0 Hz, 4H), 7.20 (s, 2H), 7.02 (d,  $J$  = 7.8 Hz, 2H), 2.55-2.41 (m, 4H), 1.72-1.60 (m, 2H), 1.15 (dd,  $J$  = 10.6, 6.8 Hz, 24H), 0.90 (d,  $J$  = 6.8 Hz, 6H), 0.50 (d,  $J$  = 6.8 Hz, 6H).  $^{13}\text{C}$  NMR (100 MHz,  $\text{CDCl}_3$ )  $\delta$  = 187.29, 147.77, 145.18, 143.94, 142.31, 136.43, 135.92, 135.64, 133.81, 130.41, 130.13, 129.89, 129.25, 125.98, 125.41, 124.16, 124.03, 28.57, 28.02, 24.26, 23.97, 23.37. HRMS (MALDI):  $m/z$   $[\text{M}-\text{BF}_4]^+$  calcd. for  $\text{C}_{48}\text{H}_{59}\text{AuN}_3^+$ : 874.4369; found: 874.4188.

## Synthesis of complex 4

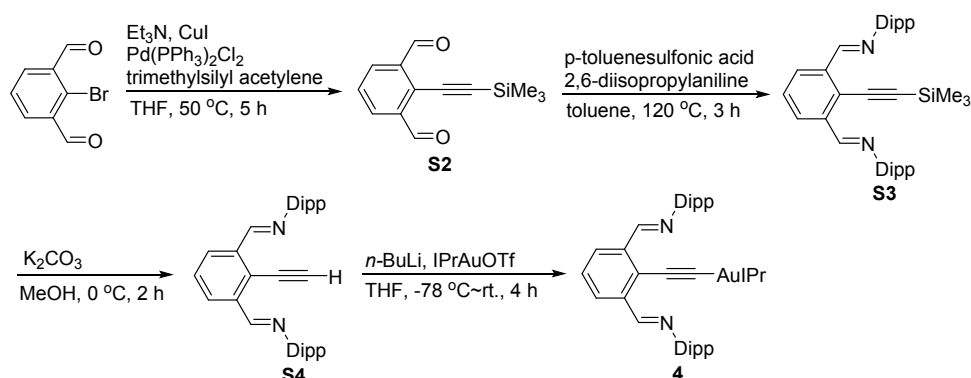

**Scheme S2.** The synthetic route for the preparation of gold acetylide **4**.

2-Bromoisophthalaldehyde (2.00 g, 9.44 mmol),  $\text{CuI}$  (179 mg, 0.94 mmol),  $\text{Pd}(\text{PPh}_3)_2\text{Cl}_2$  (330 mg, 0.47 mmol) under a nitrogen atmosphere was added into anhydrous THF (40 mL), and then  $\text{Et}_3\text{N}$  (20 mL) and trimethylsilyl acetylene (1.39 g, 14.15 mmol) was added. The mixture was stirred at  $50^\circ\text{C}$  for 5 h. All volatiles were removed under reduced pressure, and the residue was purified by column chromatography using silica gel (v/v, PE/ EtOAc = 150:1) to afford pure **S2** as a white solid (1.7 g, 78 %).  $^1\text{H}$  NMR (400 MHz,  $\text{CDCl}_3$ )  $\delta$  = 10.63 (s, 2H), 8.15 (d,  $J$  = 7.8 Hz, 2H), 7.57 (t,  $J$  = 7.8 Hz, 1H), 0.31 (s, 9H).

**S2** (500 mg, 2.17 mmol), *p*-toluenesulfonic acid (38 mg, 0.22 mmol) and 2,6-diisopropylaniline (847 mg, 4.78 mmol) was added into toluene (15 mL), and the mixture was refluxed in at  $120^\circ\text{C}$  for 3 h. The mixture was filtered and all volatiles were removed under reduced pressure to afford **S3** as a yellow solid (1.11 g, 93%).  $^1\text{H}$  NMR (400 MHz,  $\text{CDCl}_3$ )  $\delta$  = 8.79 (s, 2H), 8.45 (d,  $J$  = 8.0 Hz, 2H), 7.61 (t,  $J$  = 7.8 Hz, 1H), 7.22-7.17 (m, 4H), 7.15 (s, 2H), 3.07-2.92 (m, 4H), 1.21 (d,  $J$  = 6.8 Hz, 24H), 0.10 (s, 9H).

**S3** (500 mg, 0.91 mmol) was dissolved in methanol (20 mL), and potassium carbonate (629 mg, 4.55 mmol) was added, then the mixture was stirred at  $0^\circ\text{C}$  for 2 h. All volatiles were removed under reduced pressure and dissolved in DCM. The mixture was filtered through Celite and the filtrate was concentrated to afford **S4** as a pale yellow solid (400 mg, 92%).  $^1\text{H}$  NMR (400 MHz,  $\text{CDCl}_3$ )  $\delta$  = 8.82 (s, 2H), 8.46 (d,  $J$  = 7.8 Hz, 2H), 7.66 (t,  $J$  = 7.8 Hz, 1H), 7.21-7.14 (m, 6H), 3.55 (s, 1H), 3.05-2.95 (m, 4H), 1.21 (d,  $J$  = 6.8 Hz, 24H).  $^{13}\text{C}$  NMR (100 MHz,  $\text{CDCl}_3$ )  $\delta$  = 160.21, 148.71, 137.81, 137.42, 129.09, 128.73, 124.23, 122.89, 27.73, 23.33. HRMS (ESI):  $m/z$   $[\text{M}+\text{H}]^+$  calcd. for  $\text{C}_{34}\text{H}_{41}\text{N}_2^+$ : 477.3270; found: 477.3271.

In a nitrogen-filled round-bottom flask, a solution of **S4** (200 mg, 0.42 mmol) in THF (6 mL) was

cooled to  $-78\text{ }^{\circ}\text{C}$ , and *n*-butyllithium (1.6 M in THF, 0.31 mL, 0.50 mmol) was added dropwise. The solution was stirred in 10 min, and then IPrAuOTf (308 mg, 0.42 mmol) was added. The solution was warmed to room temperature, and stirred for 4 h at room temperature. The mixture was filtered and all volatiles were removed under reduced pressure. The residue was washed with methanol and dried in vacuum to afford pure **4** as a gray solid (326 mg, 73%).  $^1\text{H}$  NMR (400 MHz,  $\text{CDCl}_3$ )  $\delta$  = 8.78 (s, 2H), 8.23 (d,  $J$  = 7.6 Hz, 2H), 7.40 (t,  $J$  = 7.8 Hz, 2H), 7.31 (t,  $J$  = 7.8 Hz, 1H), 7.18-7.10 (m, 10H), 7.08 (s, 2H), 2.98-2.86 (m, 4H), 2.50-2.38 (m, 4H), 1.14 (dd,  $J$  = 10.2, 6.8 Hz, 24H), 1.08 (d,  $J$  = 6.8 Hz, 24H).  $^{13}\text{C}$  NMR (100 MHz,  $\text{CDCl}_3$ )  $\delta$  = 190.46, 162.55, 149.35, 145.79, 145.43, 137.82, 137.29, 133.89, 130.44, 130.19, 128.28, 125.68, 123.98, 123.65, 123.02, 122.72, 95.89, 28.62, 27.67, 24.30, 23.75. HRMS (MALDI):  $m/z$   $[\text{M}+\text{H}]^+$  calcd. for  $\text{C}_{61}\text{H}_{76}\text{AuN}_4^+$ : 1061.5736; found: 1061.5538.

### Synthesis of complex 5

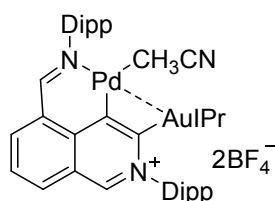

The mixture of **4** (400 mg, 0.38 mmol) and  $\text{Pd}(\text{CH}_3\text{CN})_4(\text{BF}_4)_2$  (253 mg, 0.57 mmol) was dissolved in the acetonitrile (8 mL). The solution was stirred at  $25\text{ }^{\circ}\text{C}$  for 30 min. The mixture was then filtered and all volatiles were removed under reduced pressure. The residue was washed with  $\text{Et}_2\text{O}$  and dried in vacuum to afford pure **5** as a yellow solid (463 mg, 94%).  $^1\text{H}$  NMR (400 MHz,  $\text{CDCl}_3$ )  $\delta$  = 9.65 (s, 1H), 9.14 (d,  $J$  = 8.0 Hz, 1H), 8.75 (d,  $J$  = 7.2 Hz, 1H), 8.59 (s, 1H), 8.15 (d,  $J$  = 7.8 Hz, 1H), 7.52-7.46 (m, 2H), 7.46-7.37 (m, 6H), 7.29 (d,  $J$  = 7.8 Hz, 2H), 7.17 (s, 2H), 7.13 (d,  $J$  = 7.8 Hz, 2H), 3.25-3.13 (m, 4H), 2.59-2.50 (m, 2H), 1.89 (s, 3H), 1.72-1.70 (m, 2H), 1.46 (d,  $J$  = 6.4 Hz, 6H), 1.34 (d,  $J$  = 6.8 Hz, 6H), 1.22 (d,  $J$  = 7.2 Hz, 9H), 1.12 (d,  $J$  = 6.4 Hz, 12H), 1.00 (d,  $J$  = 6.8 Hz, 9H), 0.37 (d,  $J$  = 6.8 Hz, 6H).  $^{13}\text{C}$  NMR (100 MHz,  $\text{CDCl}_3$ )  $\delta$  = 193.08, 164.32, 159.56, 149.14, 147.96, 147.39, 145.38, 144.26, 142.18, 141.27, 140.83, 132.96, 131.30, 130.10, 129.67, 126.73, 126.15, 125.09, 124.73, 124.52, 124.30, 121.49, 120.13, 28.40, 25.71, 23.48. Anal. calcd. for  $\text{C}_{63}\text{H}_{78}\text{AuB}_2\text{F}_8\text{N}_5\text{Pd}$  (0.5  $\text{CH}_2\text{Cl}_2$ ): C, 53.53; H, 5.59; N, 4.92; found: C, 53.11; H, 5.94; N, 4.44.

### Synthesis of complex 6

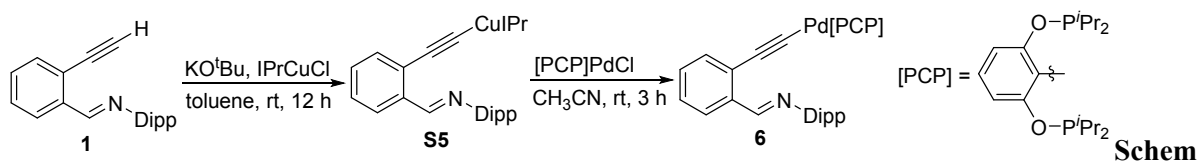

**e S3.** The synthetic route of **6** through alkynyl transformation from Cu to Pd.

In a nitrogen-filled round-bottom flask, the mixture of **1** (200 mg, 0.69 mmol), KOBu<sup>t</sup> (232 mg, 2.07 mmol) and IPrCuCl (336 mg, 0.69 mmol) was mixed in the anhydrous toluene (10 mL). After stirring at 25 °C for 12 h, the mixture was filtered and all volatiles were removed under reduced pressure. The residue was washed with hexane and dried in vacuum to afford pure **S5** as a yellow solid (454 mg, 89%). <sup>1</sup>H NMR (400 MHz, CDCl<sub>3</sub>) δ = 8.66 (s, 1H), 8.09 (d, *J* = 7.2 Hz, 1H), 7.38-7.30 (m, 4H), 7.19-7.13 (m, 8H), 7.05 (s, 2H), 2.93-2.83 (m, 2H), 2.53-2.44 (m, 4H), 1.16 (d, *J* = 6.8 Hz, 24H), 1.09 (d, *J* = 6.8 Hz, 12H). <sup>13</sup>C NMR (100 MHz, CDCl<sub>3</sub>) δ = 182.20, 163.01, 150.04, 145.87, 145.45, 137.60, 136.06, 134.33, 132.60, 130.21, 129.32, 125.35, 123.98, 123.39, 122.91, 122.53, 101.18, 28.57, 27.62, 24.81, 24.71, 23.66, 23.49. Anal. calcd. for C<sub>48</sub>H<sub>58</sub>CuN<sub>3</sub> (0.5 CH<sub>2</sub>Cl<sub>2</sub>): C, 74.40; H, 7.60; N, 5.37; found: C, 74.00; H, 7.78; N, 5.18.

**S5** (400 mg, 0.54 mmol) and [PCP]PdCl (261 mg, 0.54 mmol) was dissolved in the anhydrous acetonitrile (8 mL). After stirring at 25 °C for 3 h, the solution was filtered and all volatiles were removed under reduced pressure. The residue was purified by column chromatography using basic alumina (v/v, PE/ EtOAc = 25:1) to afford pure **6** as a yellow solid (286 mg, 72%). <sup>1</sup>H NMR (400 MHz, CDCl<sub>3</sub>) δ = 8.95 (s, 1H), 8.21 (d, *J* = 7.6 Hz, 1H), 7.40-7.30 (m, 2H), 7.24 (t, *J* = 7.6 Hz, 1H), 7.15-7.02 (m, 3H), 6.95 (t, *J* = 8.0 Hz, 1H), 6.54 (d, *J* = 8.0 Hz, 2H), 3.05-2.89 (m, 2H), 2.37-2.20 (m, 4H), 1.20-1.11 (m, 36H). <sup>13</sup>C NMR (100 MHz, CDCl<sub>3</sub>) δ = 166.17, 163.30, 150.59, 137.49, 137.16, 135.02, 131.92, 130.87, 130.63, 128.15, 125.28, 123.56, 122.54, 114.34, 105.04, 28.98, 27.77, 23.35, 17.41, 16.70. <sup>31</sup>P NMR (162 MHz, CDCl<sub>3</sub>) δ = 193.04. HRMS (MALDI): *m/z* [M+H]<sup>+</sup> calcd. For C<sub>39</sub>H<sub>54</sub>NO<sub>2</sub>P<sub>2</sub>Pd<sup>+</sup>: 736.2665; found: 736.3112.

### Synthesis of complex **7**

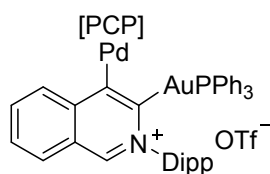

**6** (200 mg, 0.27 mmol) and PPh<sub>3</sub>AuOTf (164 mg, 0.27 mmol) was dissolved in the DCE (4 mL). After stirring at 25 °C for 3 h, the mixture was filtered and all volatiles were removed under reduced pressure. The residue was washed with Et<sub>2</sub>O and dried in vacuum to afford pure **7** as a yellow solid (352 mg, 97%). <sup>1</sup>H NMR (400 MHz, CDCl<sub>3</sub>) δ = 8.83 (s, 1H), 8.15 (d, *J* = 8.4 Hz, 1H), 8.05 (d, *J* = 8.4 Hz, 1H), 7.97 (t, *J* = 7.6 Hz, 1H), 7.77 (t, *J* = 7.2 Hz, 1H), 7.50 (t, *J* = 7.8 Hz, 1H), 7.41 (t, *J* = 7.4 Hz, 3H), 7.31 (d, *J* = 8.0 Hz, 2H), 7.20-7.12 (m, 7H), 7.12-7.05 (m, 6H), 6.72 (d, *J* = 8.0 Hz, 2H), 2.34-2.14 (m, 6H), 1.27-1.21 (m, 6H), 1.15-1.01 (m, 24H), 0.74 (dd, *J* = 16.4, 8.2 Hz, 6H). <sup>13</sup>C NMR (100

MHz, CDCl<sub>3</sub>)  $\delta$  = 193.56 (d,  $J_{P-C}$  = 133.3 Hz), 177.46, 165.14, 144.35, 143.98, 143.28, 141.34, 138.13, 133.60 (d,  $J_{P-C}$  = 13.0 Hz), 133.20, 132.77, 131.49, 130.27, 129.62, 129.15, 128.86 (d,  $J_{P-C}$  = 10.6 Hz), 128.28, 124.09, 105.46, 29.94, 28.54, 28.40 (d,  $J_{P-C}$  = 24.2 Hz), 25.36, 23.14, 18.06, 17.27, 16.60, 15.87. <sup>31</sup>P NMR (162 MHz, CDCl<sub>3</sub>)  $\delta$  = 180.74, 39.08. Anal. calcd. for C<sub>58</sub>H<sub>68</sub>AuF<sub>3</sub>NO<sub>5</sub>P<sub>3</sub>PdS (0.5 CH<sub>2</sub>Cl<sub>2</sub>): C, 50.66; H, 5.01; N, 1.01; found: C, 50.78; H, 5.01; N, 1.01. HRMS (MALDI): m/z [M-OTf]<sup>+</sup> calcd. For C<sub>57</sub>H<sub>68</sub>AuNO<sub>2</sub>P<sub>3</sub>Pd<sup>+</sup>: 1194.3163; found: 1194.2997.

### Synthesis of complex **8**

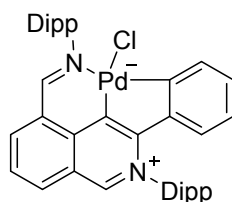

#### From the coupling reaction of **5** with PhI:

In a nitrogen-filled round-bottom flask, **5** (200 mg, 0.15 mmol) and PhI (306 mg, 1.5 mmol) was dissolved in the anhydrous acetonitrile (6 mL), and the solution was refluxed at 110 °C. After 24 h, the mixture was filtered and all volatiles were removed under reduced pressure. Then the residue was purified by column chromatography using neutral alumina (v/v, DCM/ EtOH = 100:1) to afford pure **8** as an orange red solid (52 mg, 50 %). <sup>1</sup>H NMR (400 MHz, CDCl<sub>3</sub>)  $\delta$  = 8.44 (d,  $J$  = 7.6 Hz, 1H), 8.21 (s, 1H), 8.17 (s, 1H), 7.84 (d,  $J$  = 7.6 Hz, 1H), 7.78 (d,  $J$  = 6.8 Hz, 1H), 7.67 (t,  $J$  = 7.6 Hz, 1H), 7.55-7.50 (m, 1H), 7.45 (d,  $J$  = 7.9 Hz, 2H), 7.25-7.19 (m, 3H), 6.79 (t,  $J$  = 7.6 Hz, 1H), 6.38 (t,  $J$  = 7.6 Hz, 1H), 5.48 (d,  $J$  = 7.2 Hz, 1H), 3.48-3.40 (m, 2H), 2.44-2.36 (m, 2H), 1.42 (d,  $J$  = 6.8 Hz, 5H), 1.18-1.10 (m, 12H), 1.06 (d,  $J$  = 6.8 Hz, 6H). <sup>13</sup>C NMR (100 MHz, DMSO)  $\delta$  = 167.98, 166.96, 166.32, 160.35, 149.54, 147.29, 145.74, 142.87, 139.37, 138.88, 137.09, 136.80, 134.18, 131.74, 129.31, 128.31, 125.53, 124.81, 124.12, 122.76, 122.25, 28.16, 27.88, 24.43, 24.11, 22.67. HRMS (MALDI): m/z [M-Cl]<sup>+</sup> calcd. For C<sub>40</sub>H<sub>43</sub>N<sub>2</sub>Pd<sup>+</sup>: 657.2461; found: 657.2396.

#### From Pd(CH<sub>3</sub>CN)<sub>4</sub>(BF<sub>4</sub>)<sub>2</sub> promoted cyclization reaction of **10**:

**10** (200 mg, 0.36 mmol) and Pd(CH<sub>3</sub>CN)<sub>4</sub>(BF<sub>4</sub>)<sub>2</sub> (191 mg, 0.43 mmol) was dissolved in the acetonitrile (4 mL). After stirring at 25 °C for 30 min, the mixture was filtered and all volatiles were removed under reduced pressure. The residue was purified by column chromatography using neutral alumina (v/v, DCM/ EtOH = 100:1) to afford pure **8** as an orange red solid (115 mg, 46 %).

### Synthesis of complex **9**



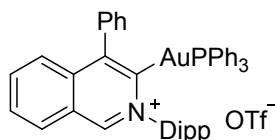

In a nitrogen-filled round-bottom flask, **7** (200 mg, 0.15 mmol) and PhI (304 mg, 1.5 mmol) was dissolved in anhydrous acetonitrile (6 mL), and the solution was refluxed at 110 °C. After 48 h, the mixture was filtered and all volatiles were removed under reduced pressure. The residue was purified by column chromatography using neutral alumina (v/v, DCM/ EtOH = 100:1) to afford pure **9** as offwhite solid (121 mg, 83 %). <sup>1</sup>H NMR (400 MHz, CDCl<sub>3</sub>) δ = 9.69 (s, 1H), 8.67 (d, *J* = 8.4 Hz, 1H), 8.04 (t, *J* = 8.0 Hz, 1H), 7.93-7.86 (m, 3H), 7.77 (td, *J* = 8.4, 4.0 Hz, 2H), 7.64-7.59 (m, 4H), 7.50-7.45 (m, 5H), 7.39-7.35 (m, 5H), 6.97 (dd, *J* = 12.8, 6.8 Hz, 6H), 2.27-2.16 (m, 2H), 1.18 (d, *J* = 6.8 Hz, 6H), 1.05 (d, *J* = 6.8 Hz, 6H). <sup>13</sup>C NMR (100 MHz, CDCl<sub>3</sub>) δ = 188.60 (d, *J*<sub>P-C</sub> = 116.9 Hz), 147.99, 146.87, 143.90, 143.50, 138.19, 136.95, 135.67, 134.26 (d, *J*<sub>P-C</sub> = 10.4 Hz), 133.64 (d, *J*<sub>P-C</sub> = 13.8 Hz), 131.74, 130.73, 130.60, 129.07 (d, *J*<sub>P-C</sub> = 11.3 Hz), 128.55, 126.33, 125.52, 124.54, 117.79, 116.90, 28.55, 24.37, 23.73, 18.00. <sup>31</sup>P NMR (162 MHz, CDCl<sub>3</sub>) δ = 40.010. HRMS (MALDI): *m/z* [M-OTf]<sup>+</sup> calcd. For C<sub>45</sub>H<sub>42</sub>AuNP<sup>+</sup>: 824.2715; found: 824.2318.

### Synthesis of compound 10

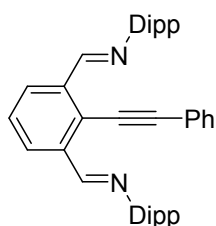

2-(Phenylethynyl) isophthalaldehyde (800 mg, 3.42 mmol), *p*-toluenesulfonic acid (59 mg, 0.34 mmol) and 2,6-diisopropylaniline (1.33 g, 7.52 mmol) was mixed in the toluene (20 mL). After refluxed at 120 °C for 10 min, the mixture was filtered and all volatiles were removed under reduced pressure. The residue was washed with methanol and dried in vacuum to afford **10** as a yellow solid (1.3 g, 69%). <sup>1</sup>H NMR (400 MHz, CDCl<sub>3</sub>) δ = 8.90 (s, 2H), 8.49 (d, *J* = 7.8 Hz, 2H), 7.65 (t, *J* = 7.8 Hz, 1H), 7.39-7.33 (m, 2H), 7.32-7.27 (m, 3H), 7.22-7.17 (m, 4H), 7.16-7.10 (m, 2H), 3.09-2.97 (m, 4H), 1.21 (d, *J* = 6.9 Hz, 24H). <sup>13</sup>C NMR (100 MHz, CDCl<sub>3</sub>) δ = 160.36, 149.02, 137.51, 131.44, 129.13, 128.83, 128.37, 125.84, 124.34, 123.08, 121.79, 101.21, 82.46, 28.00, 23.60. HRMS (ESI): *m/z* [M+H]<sup>+</sup> calcd. for C<sub>40</sub>H<sub>45</sub>N<sub>2</sub><sup>+</sup>: 553.3583; found: 553.3582.

### Reaction of complex **3** with PhI in the presence of Pd(CH<sub>3</sub>CN)<sub>4</sub>(BF<sub>4</sub>)<sub>2</sub>:

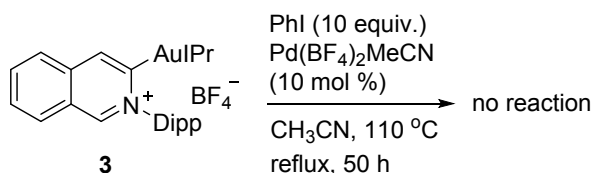

### Scheme S4. Reaction of complex **3** with PhI in the presence of Pd(CH<sub>3</sub>CN)<sub>4</sub>(BF<sub>4</sub>)<sub>2</sub>

In a nitrogen-filled round-bottom flask, **3** (100 mg, 0.10 mmol), Pd(CH<sub>3</sub>CN)<sub>4</sub>(BF<sub>4</sub>)<sub>2</sub> (5 mg, 0.01 mmol) and PhI (212 mg, 1.04 mmol) was dissolved in anhydrous acetonitrile (4 mL). After refluxed at 110 °C for 50 h, all volatiles were removed under vacuum. The reaction residue was characterized by <sup>1</sup>H NMR analysis, and no expected coupling product was observed.

### Testing the stability of **5** in acetonitrile at 110 °C:

In a nitrogen-filled round-bottom flask, the complex **5** (50 mg, 0.04 mmol) was dissolved in the anhydrous acetonitrile (2 mL). After refluxed at 110 °C for 20 h, all volatiles were removed under vacuum. The residue was characterized by <sup>1</sup>H NMR analysis, and no decomposition was observed.

### References

1. H. Wu, Y.-P. He and L.-Z. Gong, *Org. Lett.*, 2013, **15**, 460.
2. Y. Sota, M. Yamamoto, M. Murai, J. Uenishi and M. Uemura, *Chem. - Eur. J.*, 2015, **21**, 4398.
3. A. Collado, A. Gómez-Suárez, A. R. Martín, A. M. Z. Slawin and S. P. Nolan *Chem. Commun.*, 2013, **49**, 5541.
4. G. L. Tolnai, S. Ganss, J. P. Brand and J. Waser, *Org. Lett.*, 2013, **15**, 112.
5. A. Adhikary, J. R. Schwartz, L. M. Meadows, J. A. Krause and H. Guan, *Inorg. Chem. Front.*, 2014, **1**, 71.

# NMR Spectra

## Compound 1

PROTON CDCl3 [D:\data\research\new\2017-9-30] nmr 16

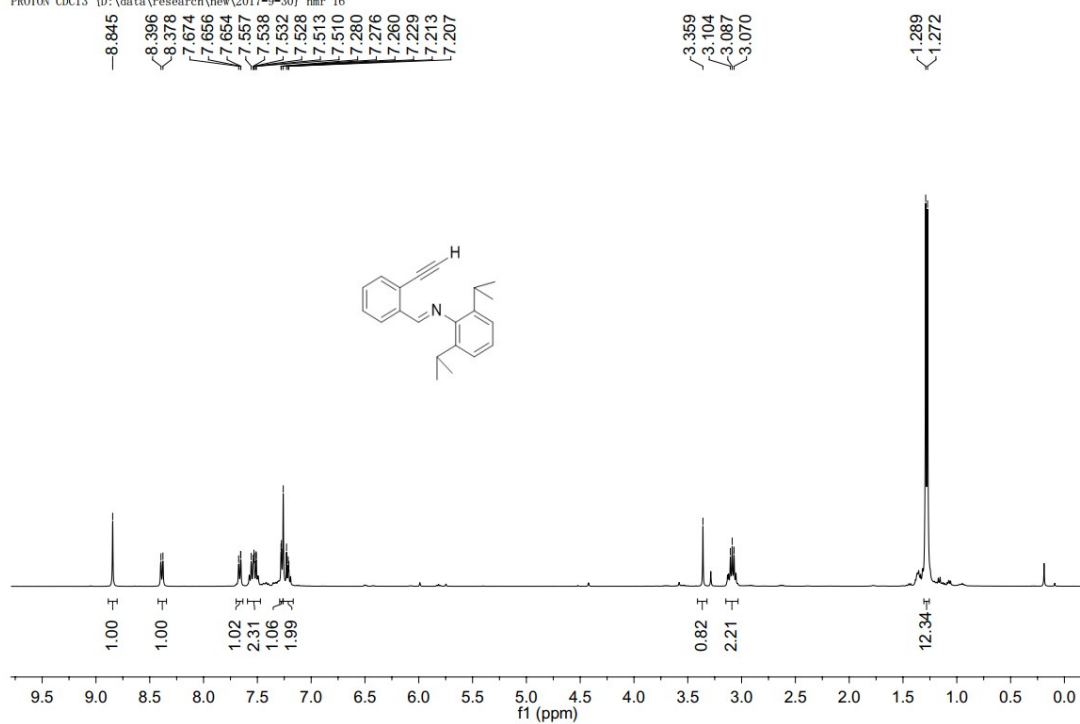

C13CPD CDCl3 [D:\data\research\new\2017-9-30] nmr 16

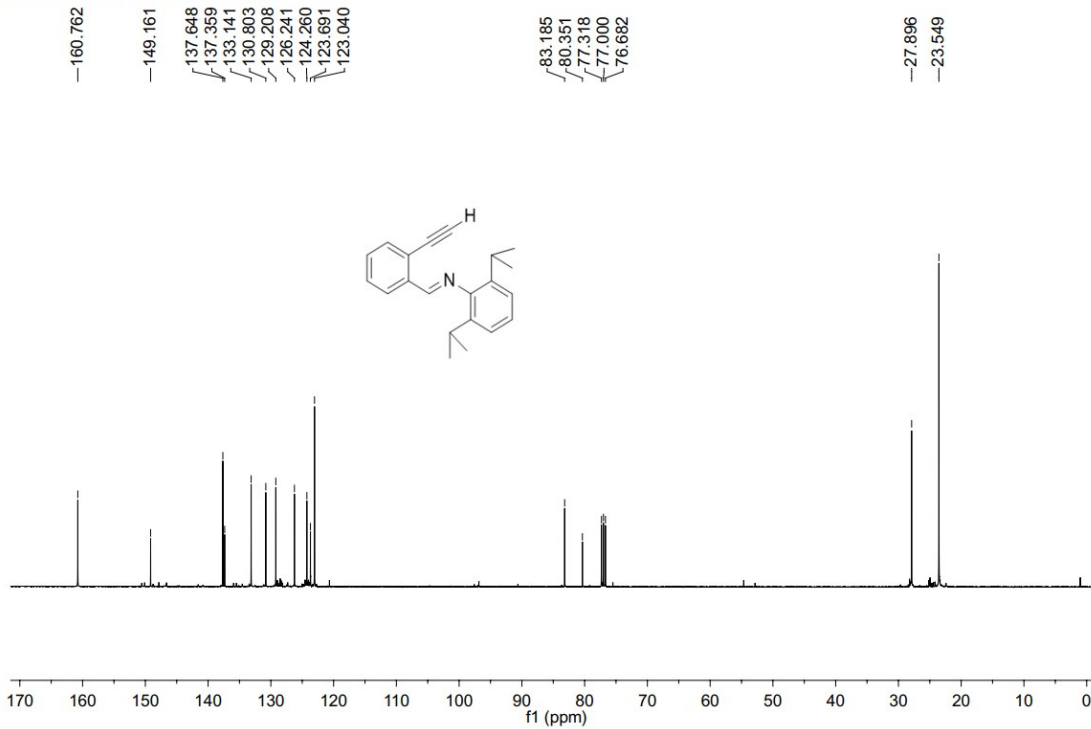

## Complex 2

PROTON CDCl3 [D:\data\research\new\2017-9-26] nmr 42

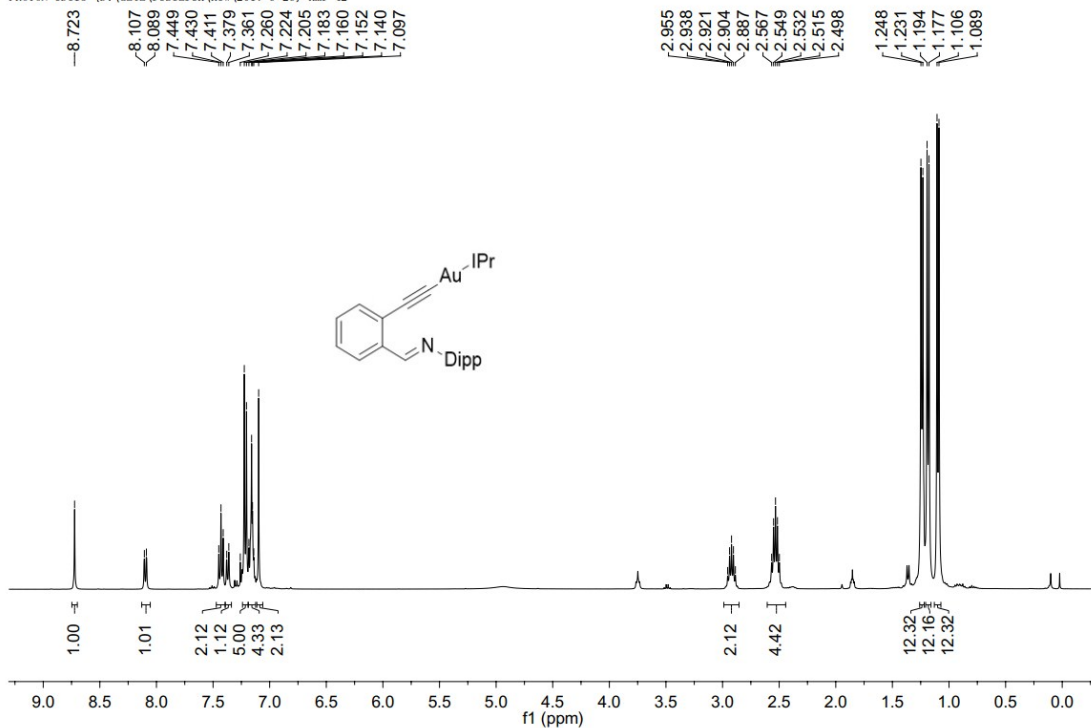

C13CPD CDC13 {D:\data\research\new\2017-9-26} nmr 42

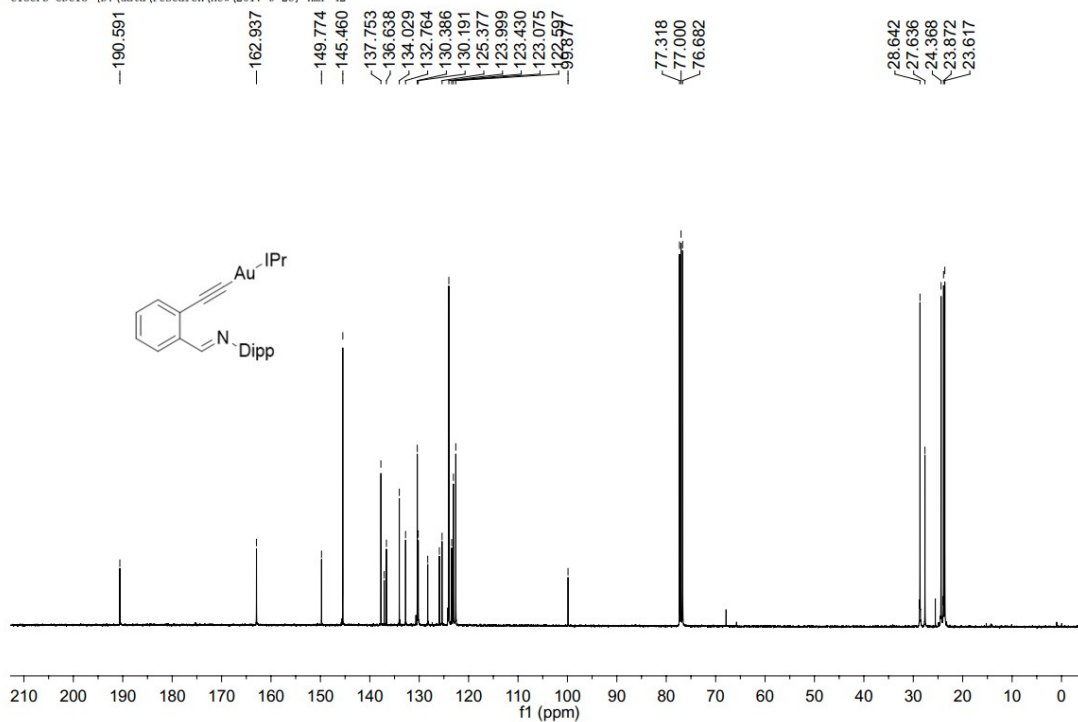

### Complex 3

PROTON CDC13 {D:\data\research\new\2017-9-22} nmr 47

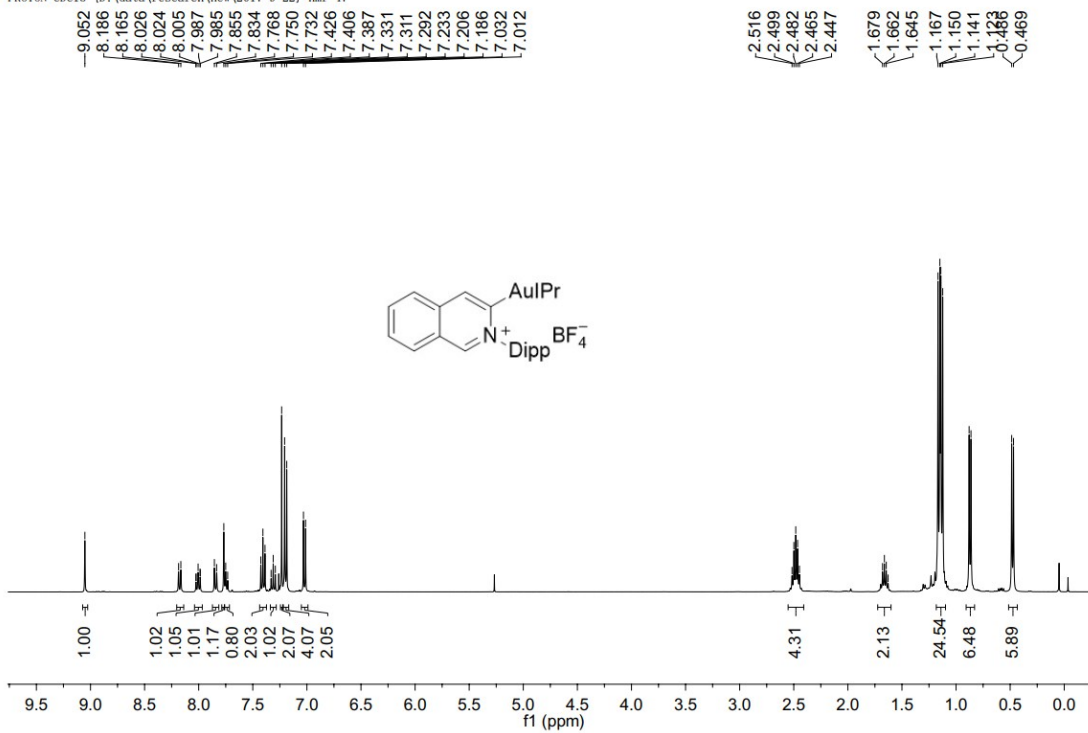

C13CPD CDC13 [D:\data\research\new\2017-9-22] nmr 47

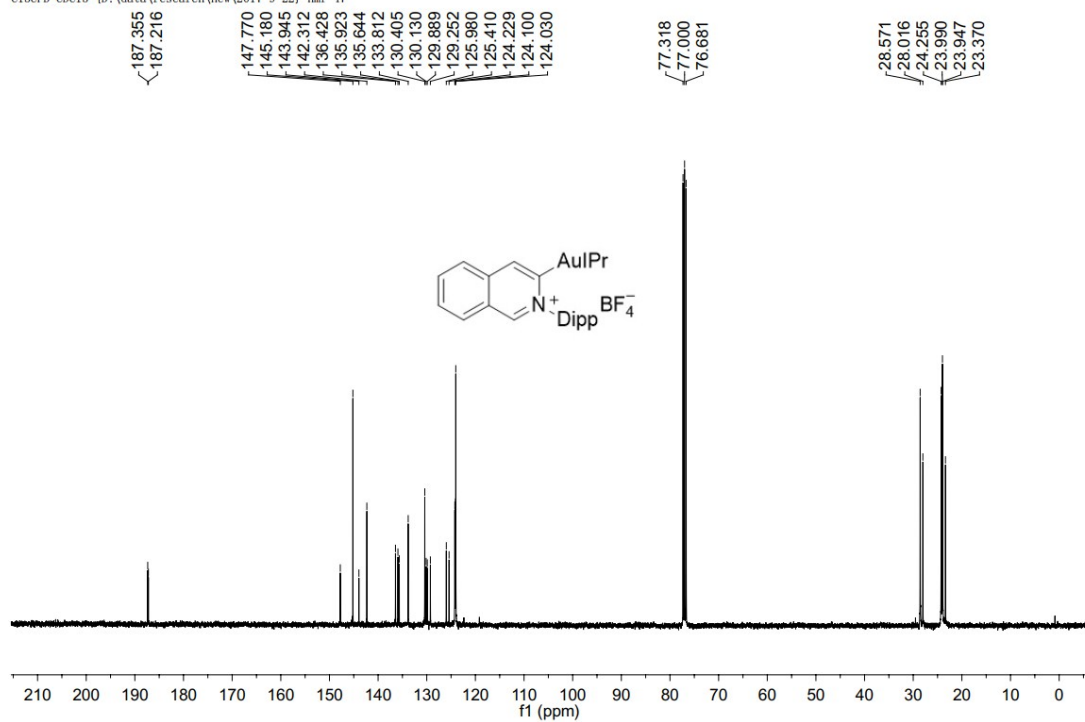

## Compound S2

ju-wgd-004

PROTON CDC13 [D:\data\research\new\2018-11-13] nmr 18

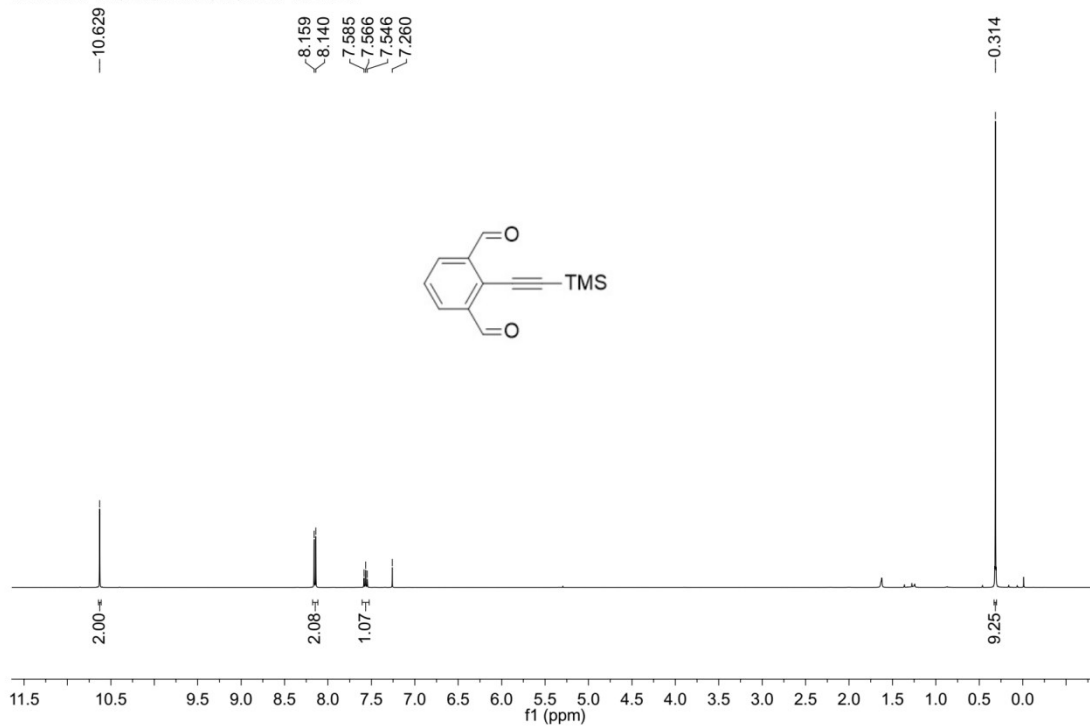

### Compound S3

ju-jwz-201  
 PROTON CDCl3 [D:\data\research\new\2017-12-27] nmr 27

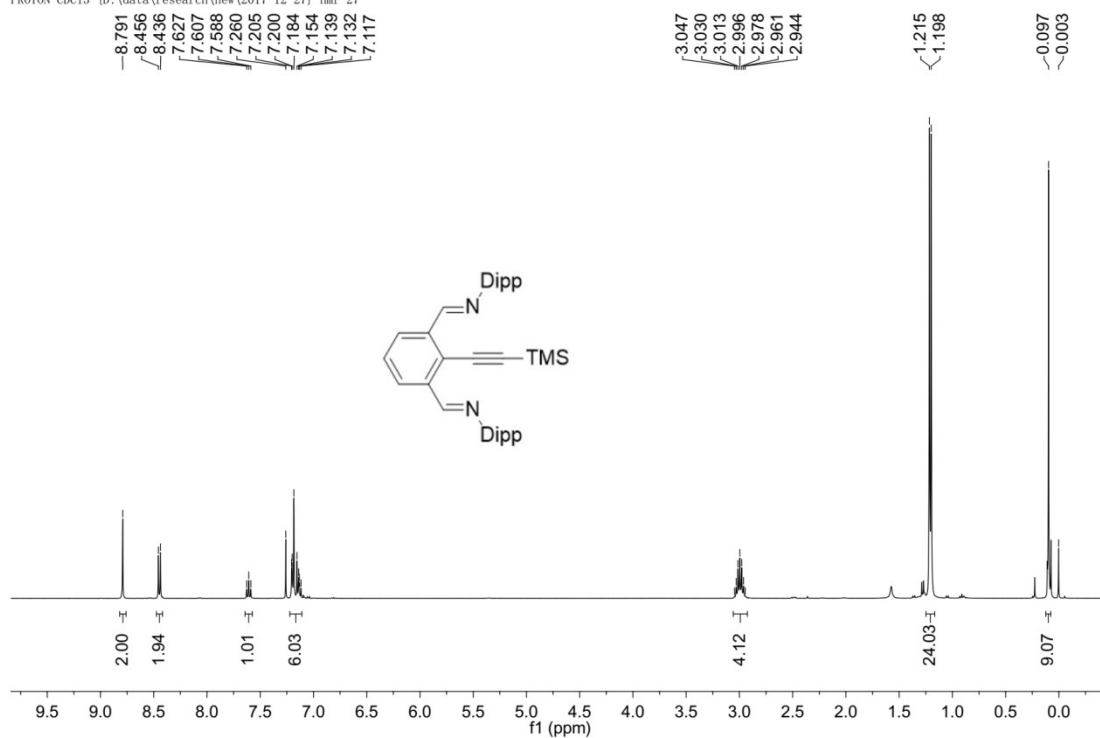

### Compound S4

ju-zx-0120  
 PROTON CDCl3 [D:\data\research\new\2018-12-21] nmr 6

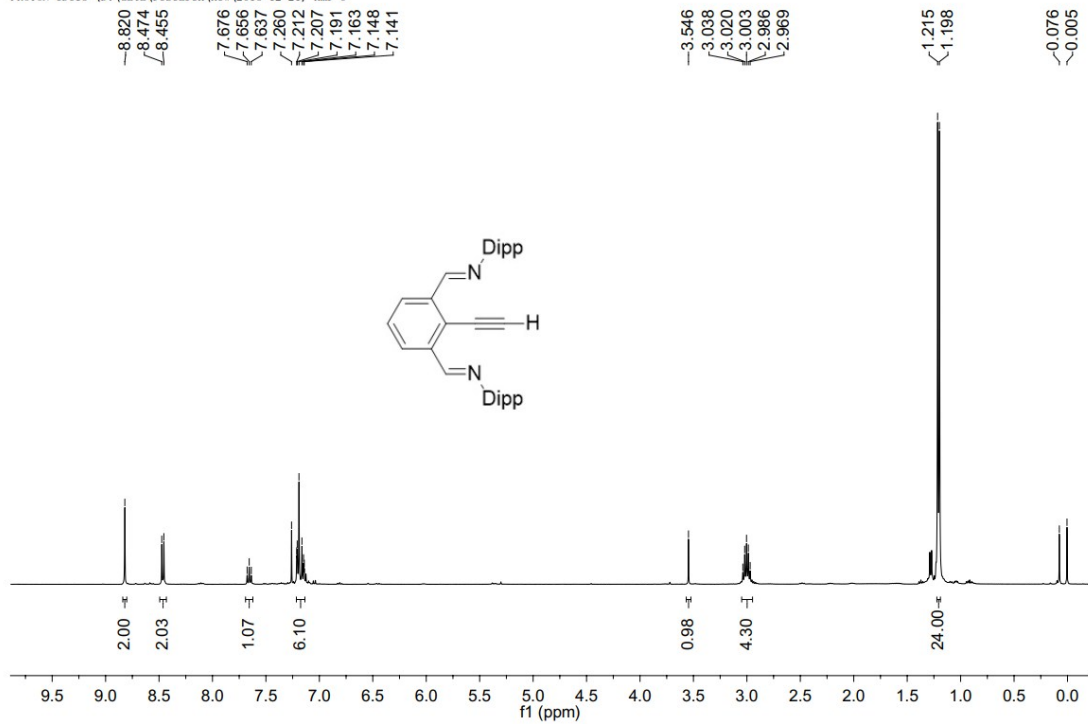





C13CPD CDC13 {D:\data\research\new\2018-6-12} nmr 49

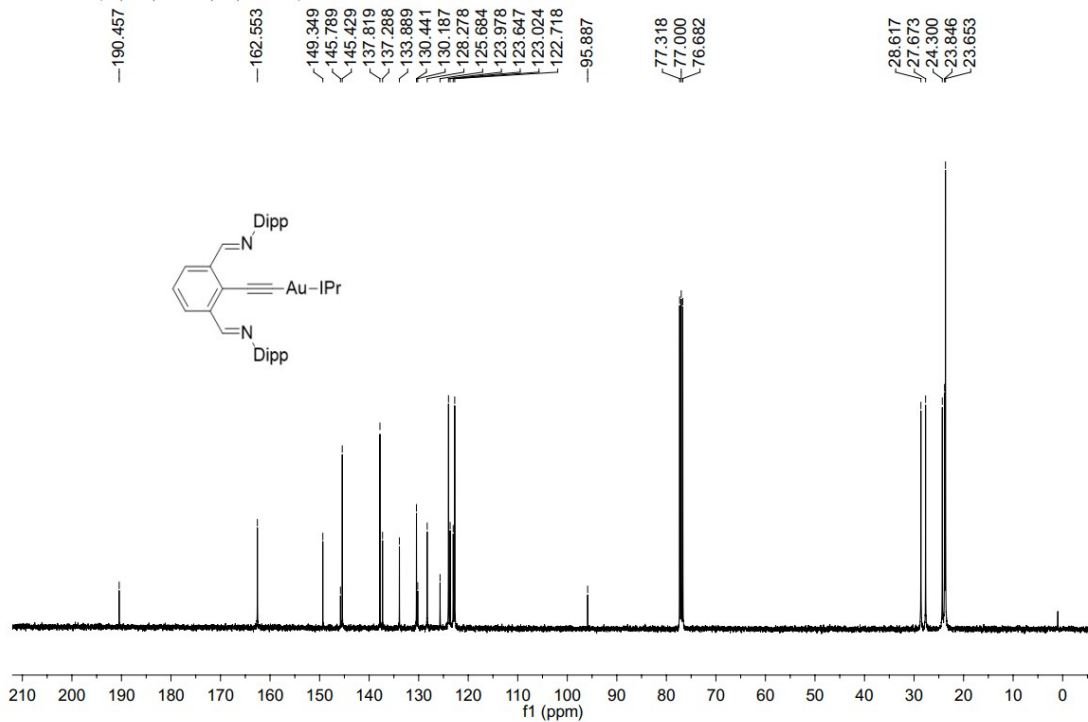

### Complex 5

ju-jwt-216

PROTON CDC13 {D:\data\research\new\2018-12-25} nmr 11

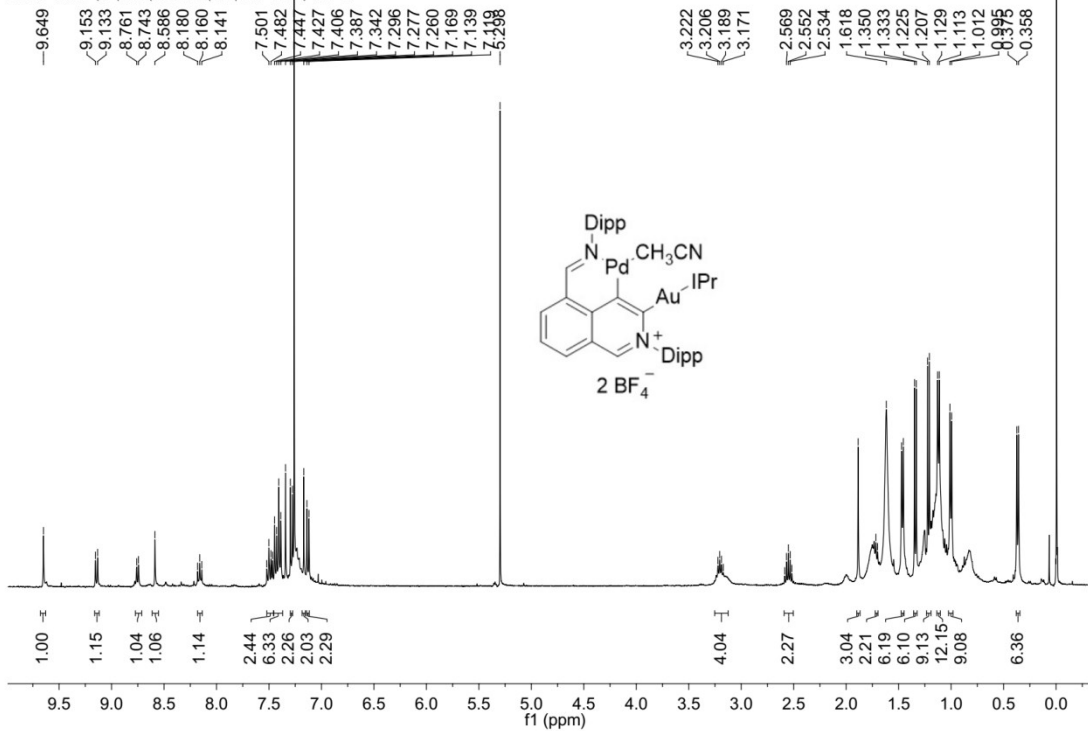

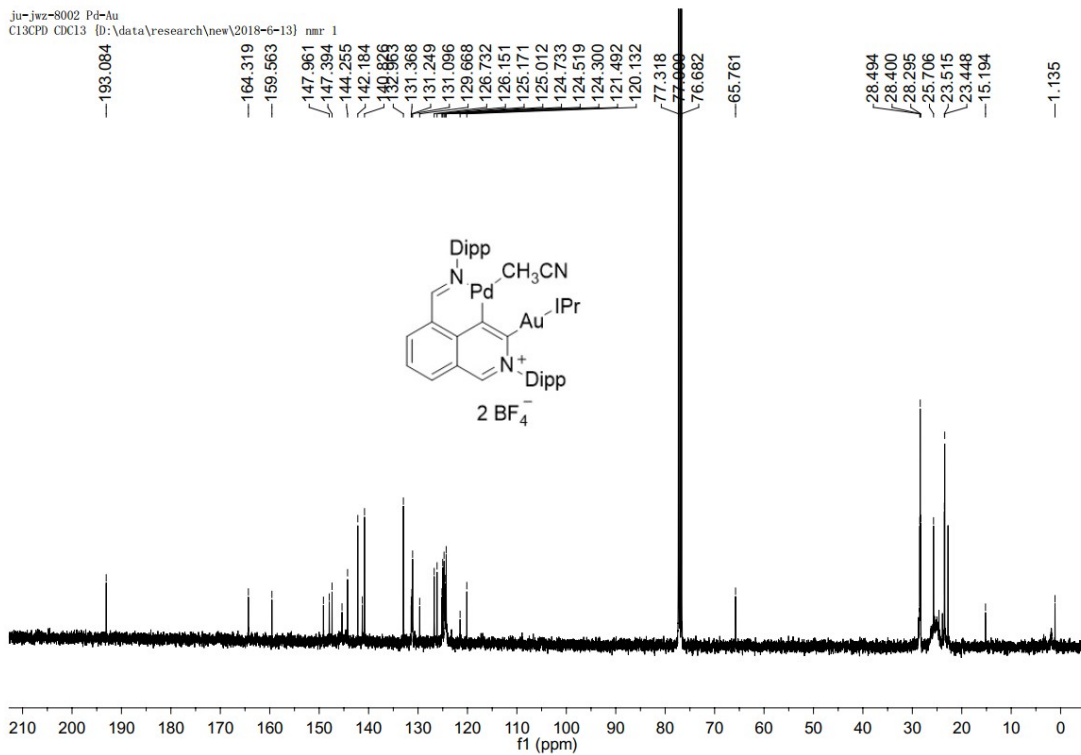

## Complex S5

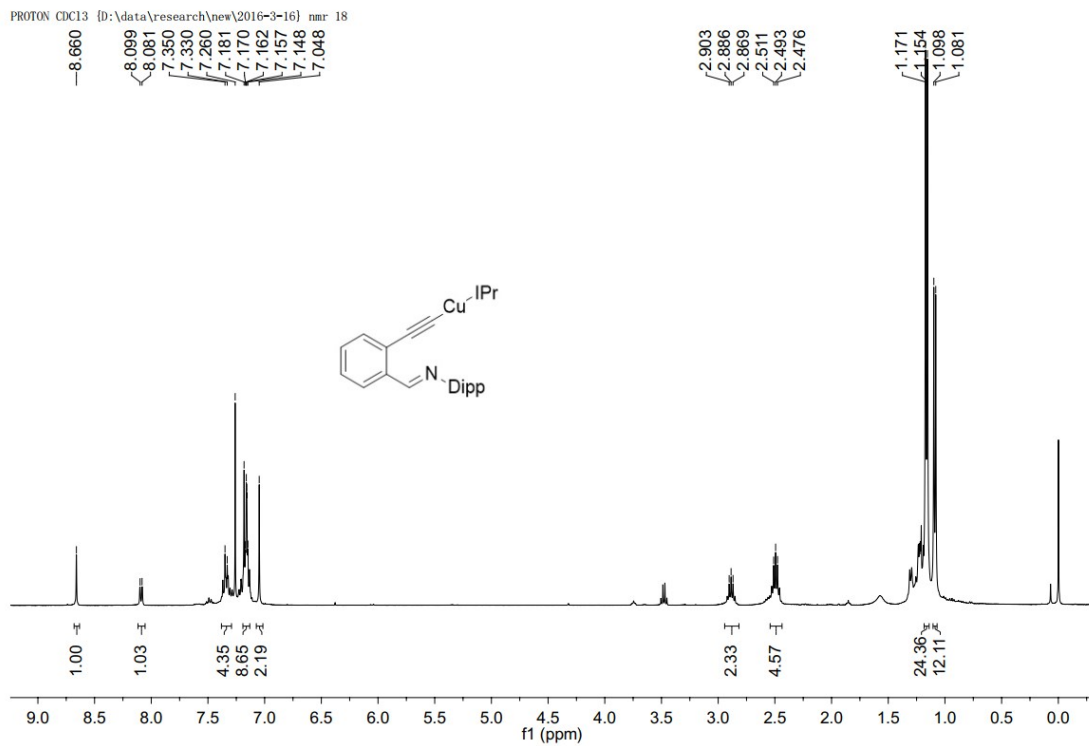

C13CPD CDC13 [D:\data\research\new\2017-9-30] nmr 41

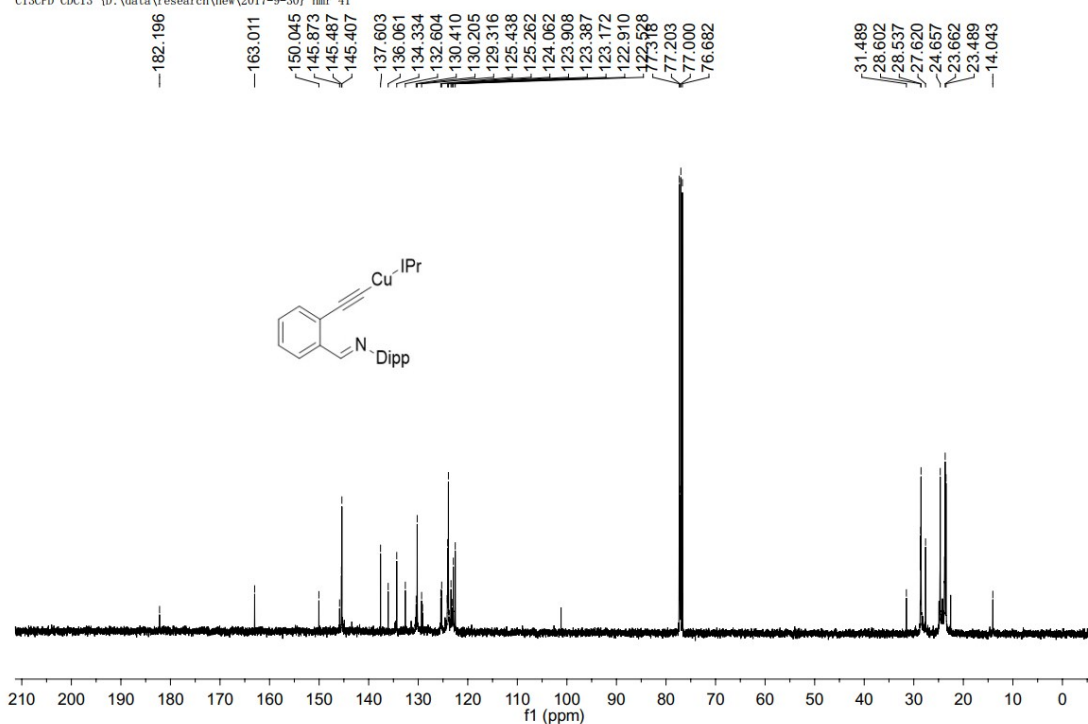

## Complex 6

PROTON CDC13 [D:\data\research\new\2019-4-16] nmr 1

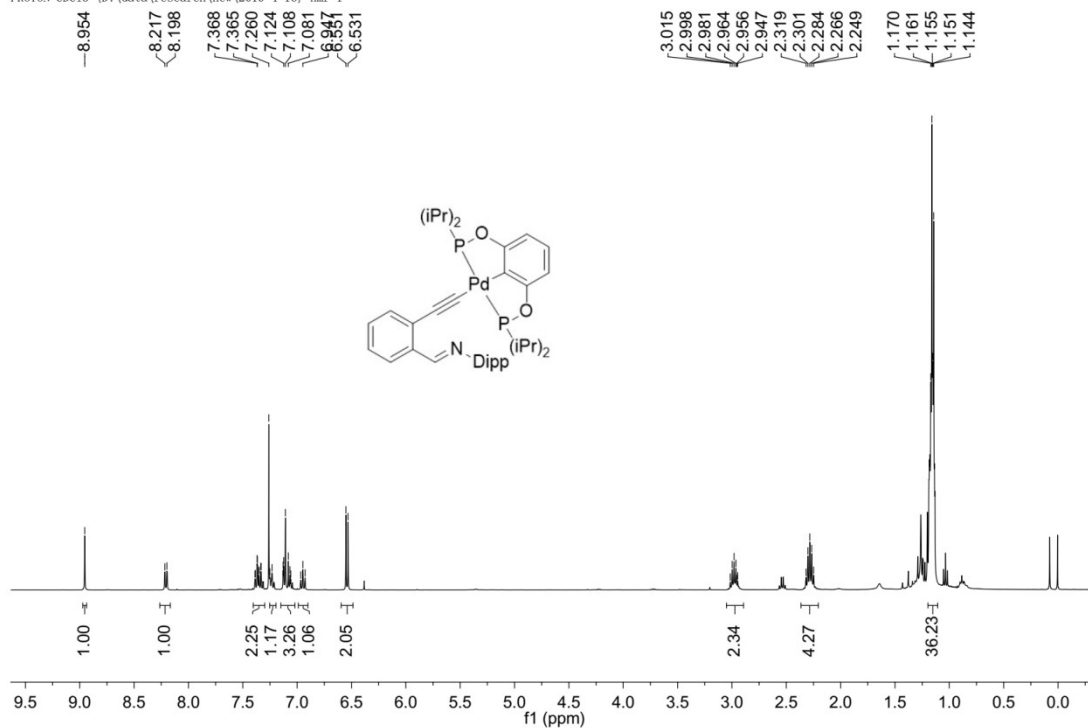

C13CPD CDC13 [D:\data\research\new\2019-4-30] nmr 7

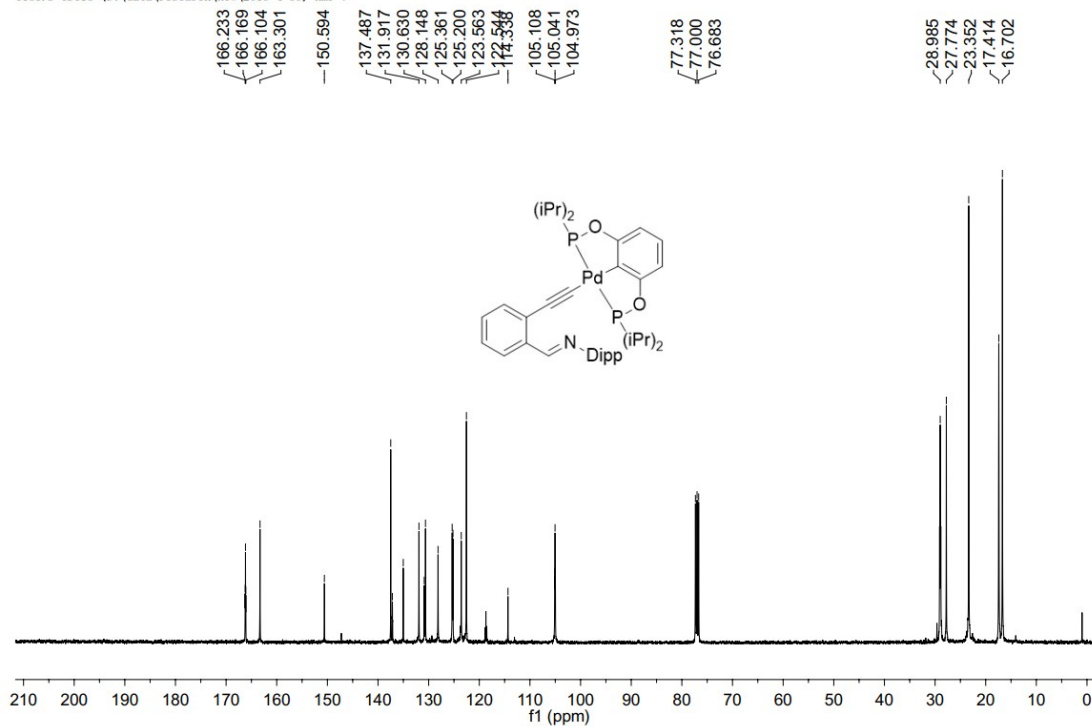

P31CPD CDC13 [D:\data\research\new\2019-12-5] nmr 26

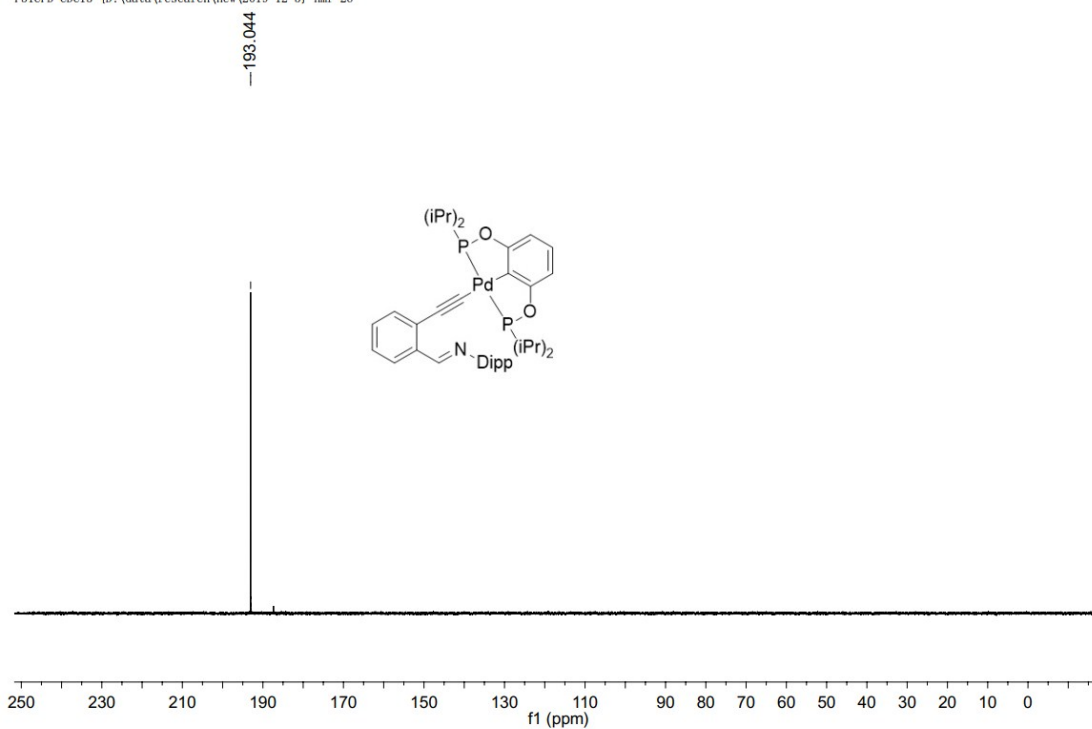

## Complex 7

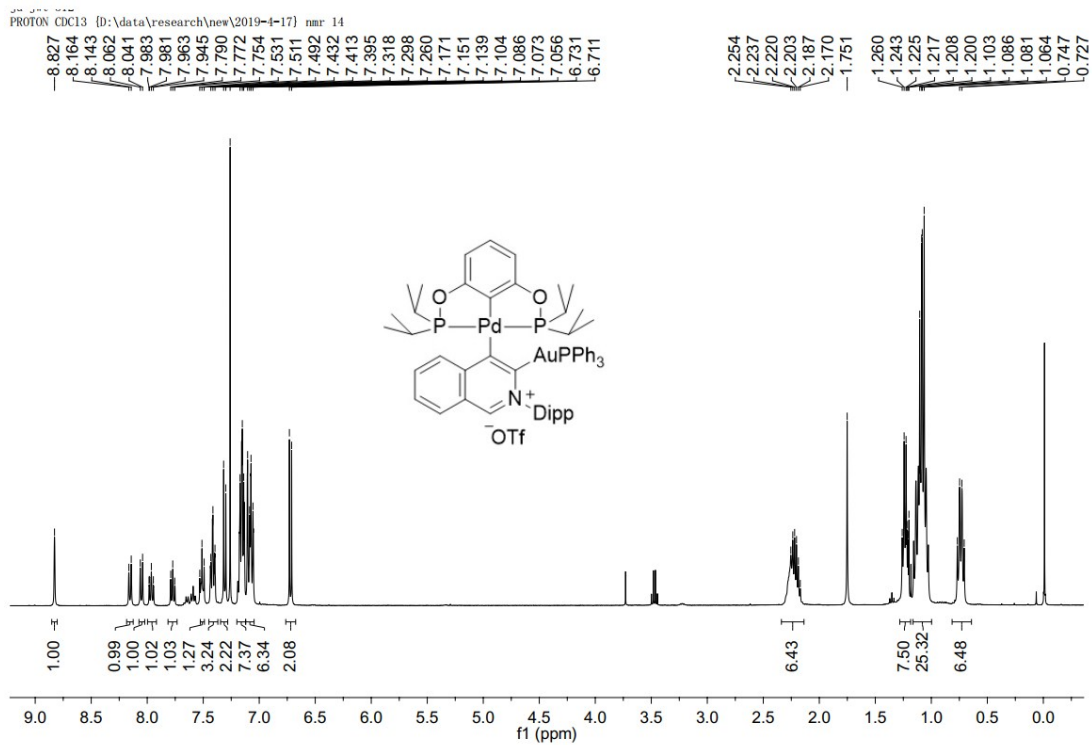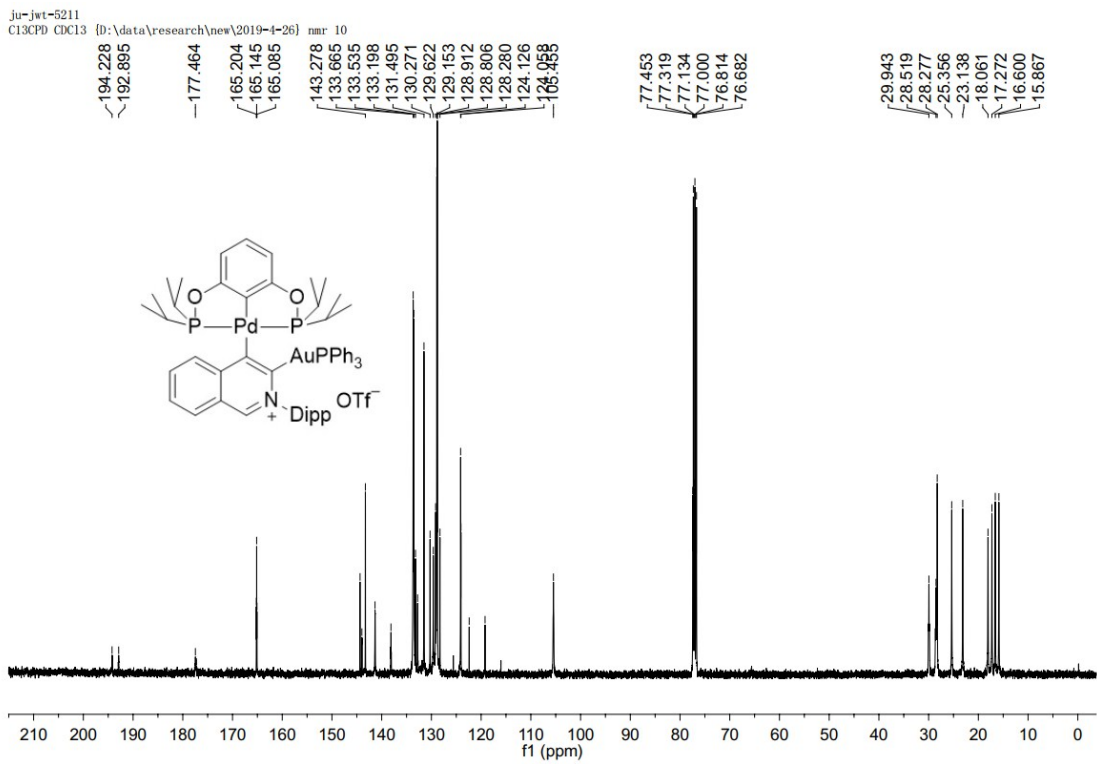

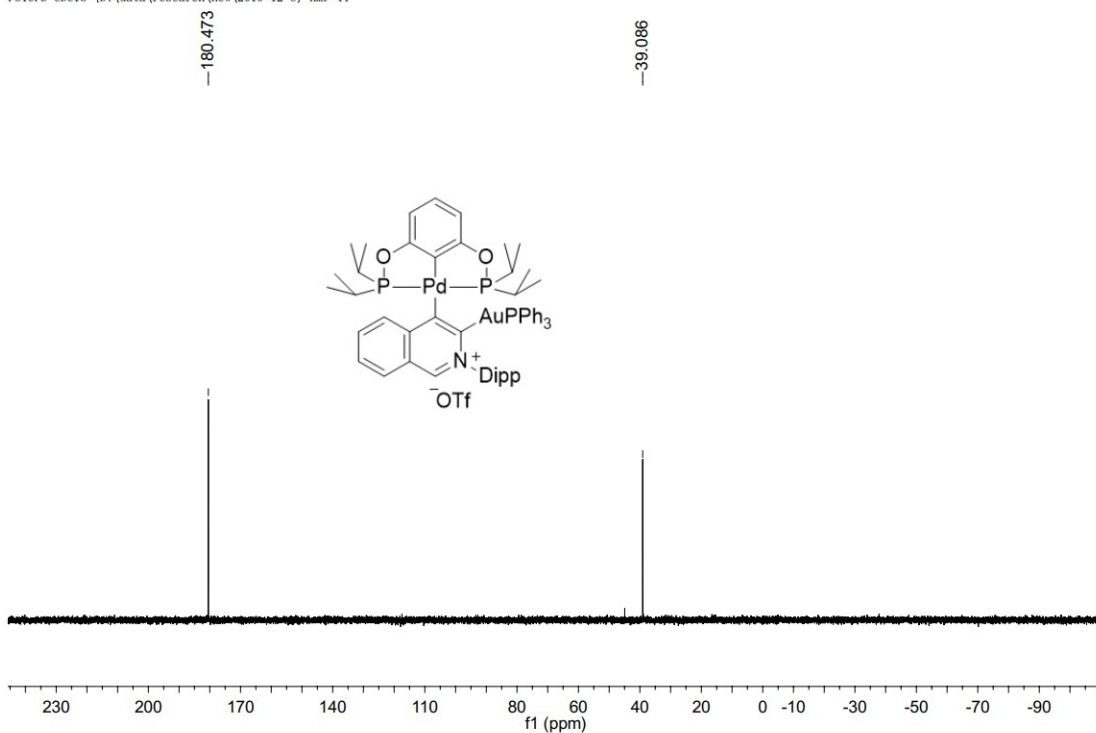

### Complex 8

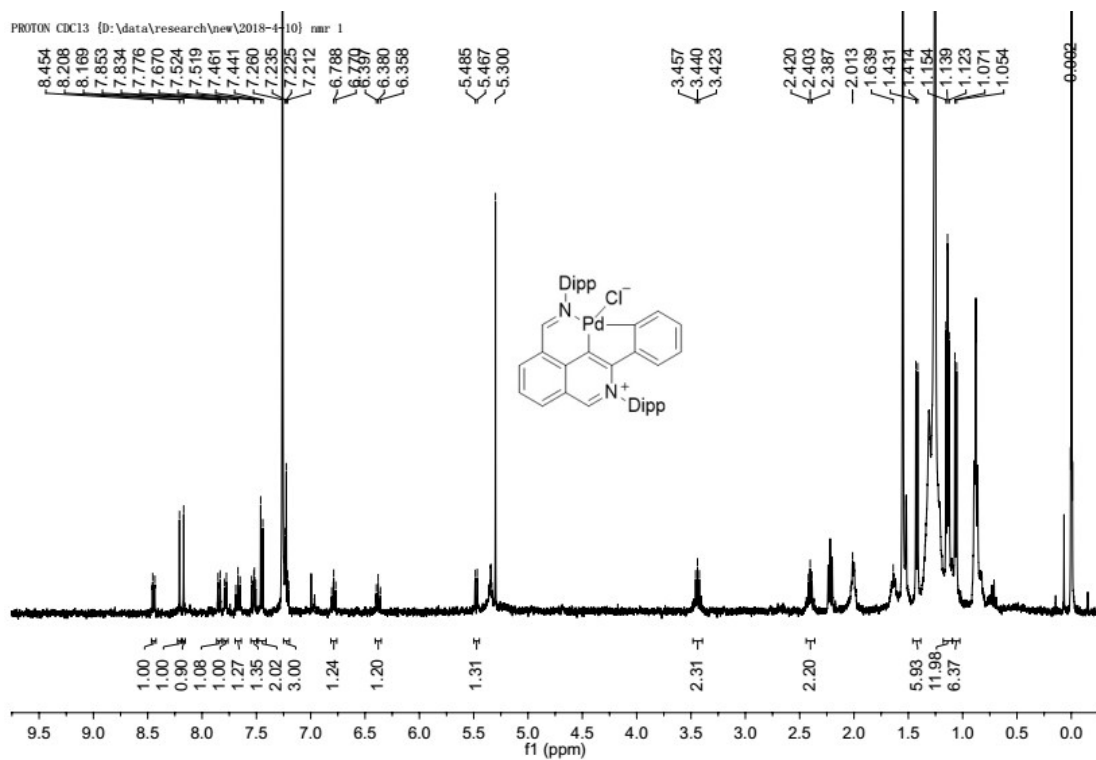

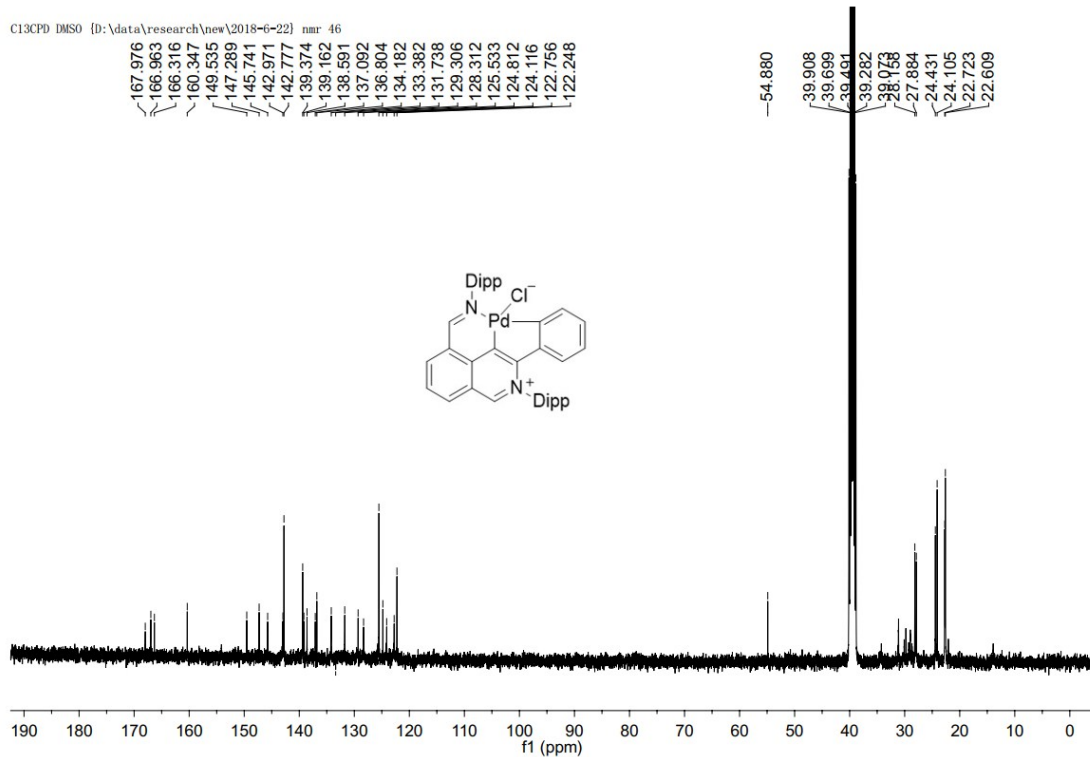

## Complex 9

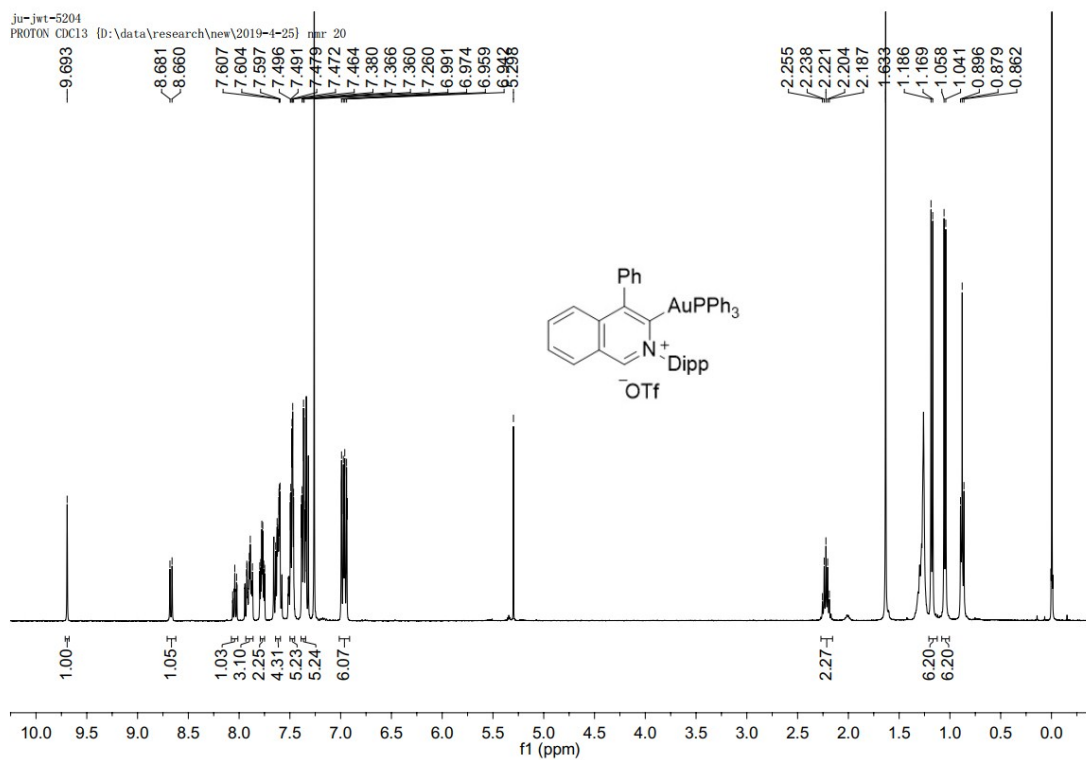

ju-z1c-6296

C13CPD CDC13 {D:\data\research\new\2019-6-28} nmr 12

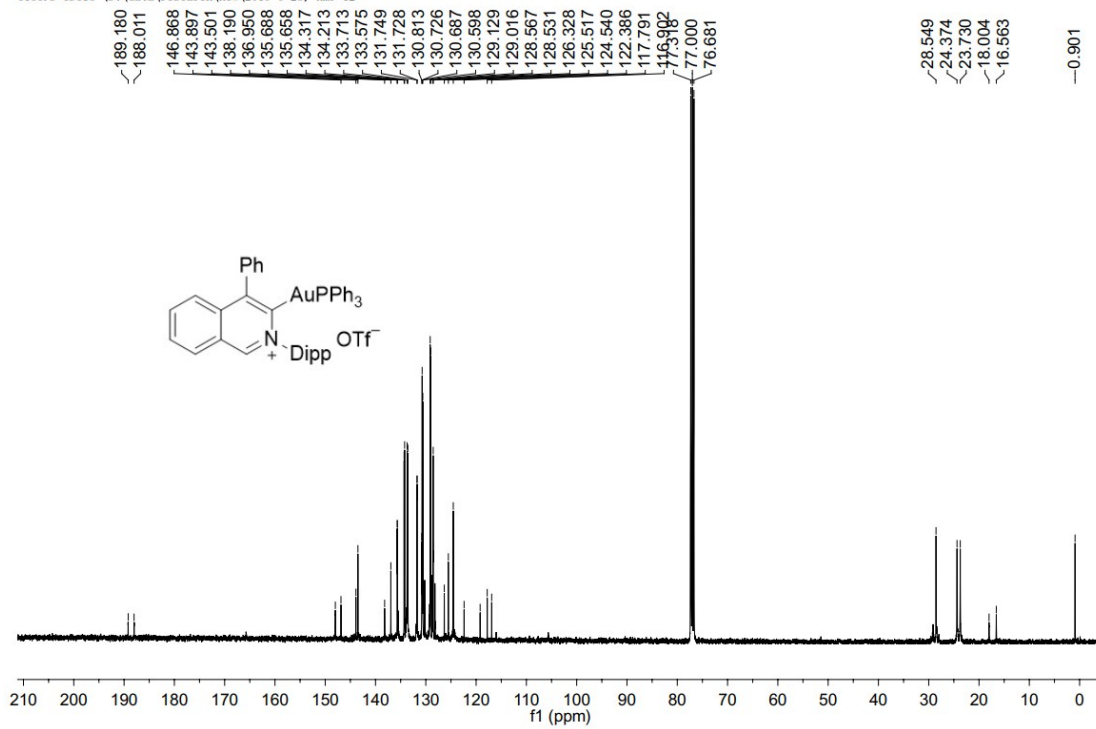

P31CPD CDC13 {D:\data\research\new\2019-12-11} nmr 42

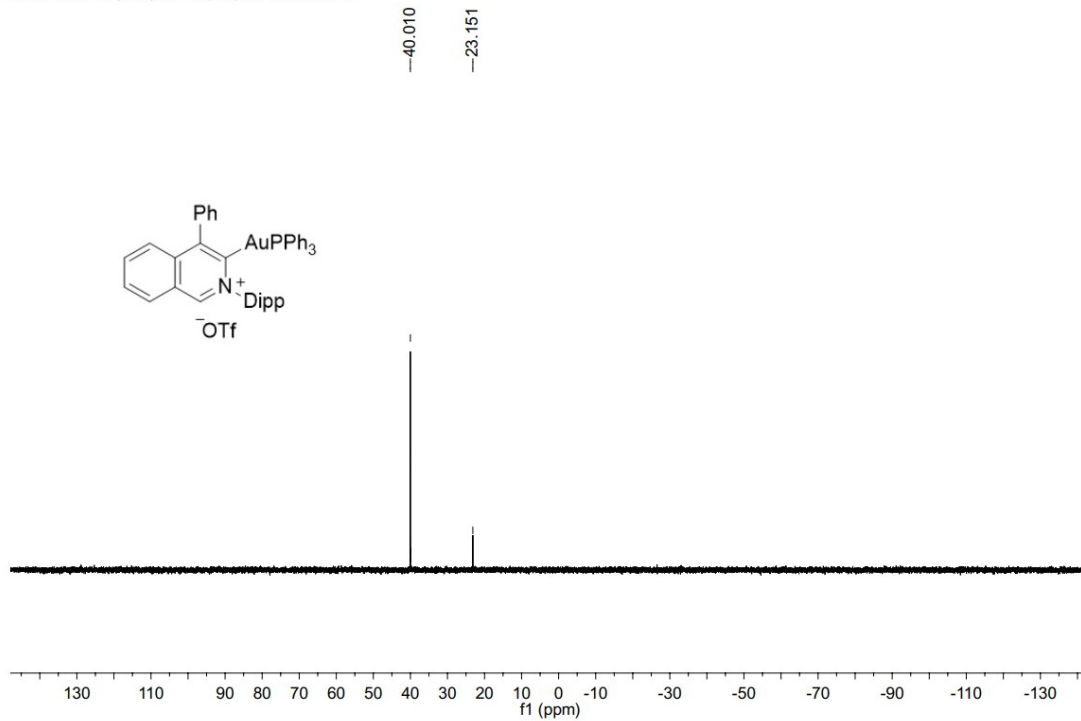

## Compound 10



PROTON CDC13 [D:\data\research\new\2018-5-29] nmr 15

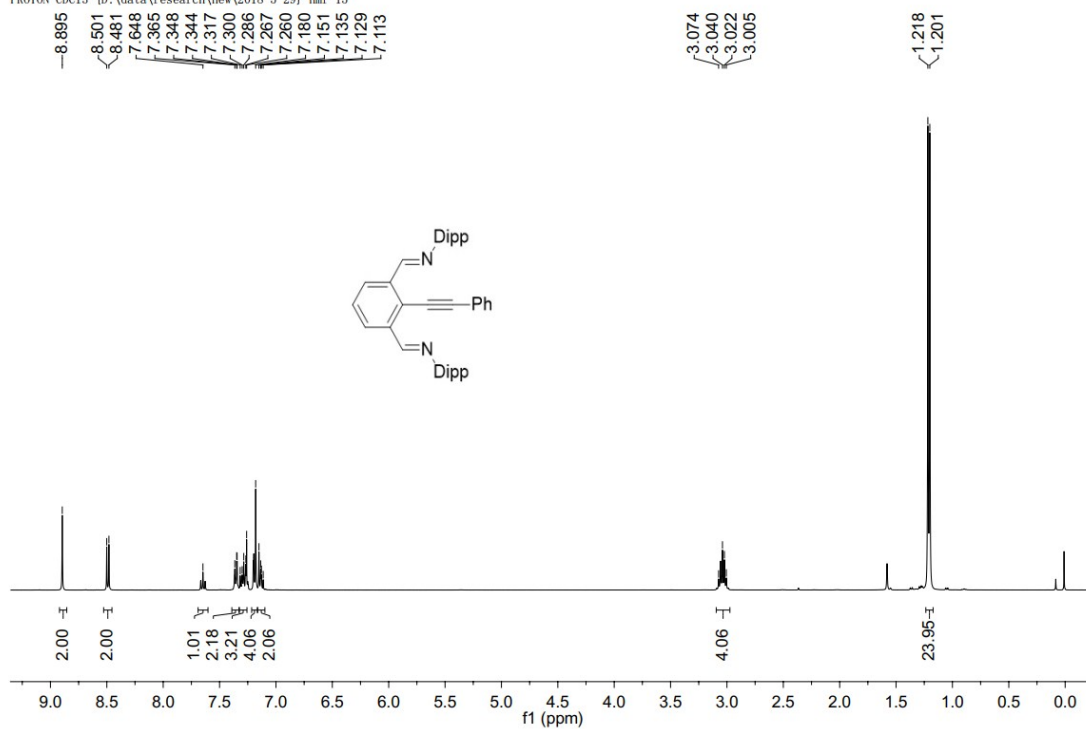

C13CPD CDC13 [D:\data\research\new\2018-6-8] nmr 9

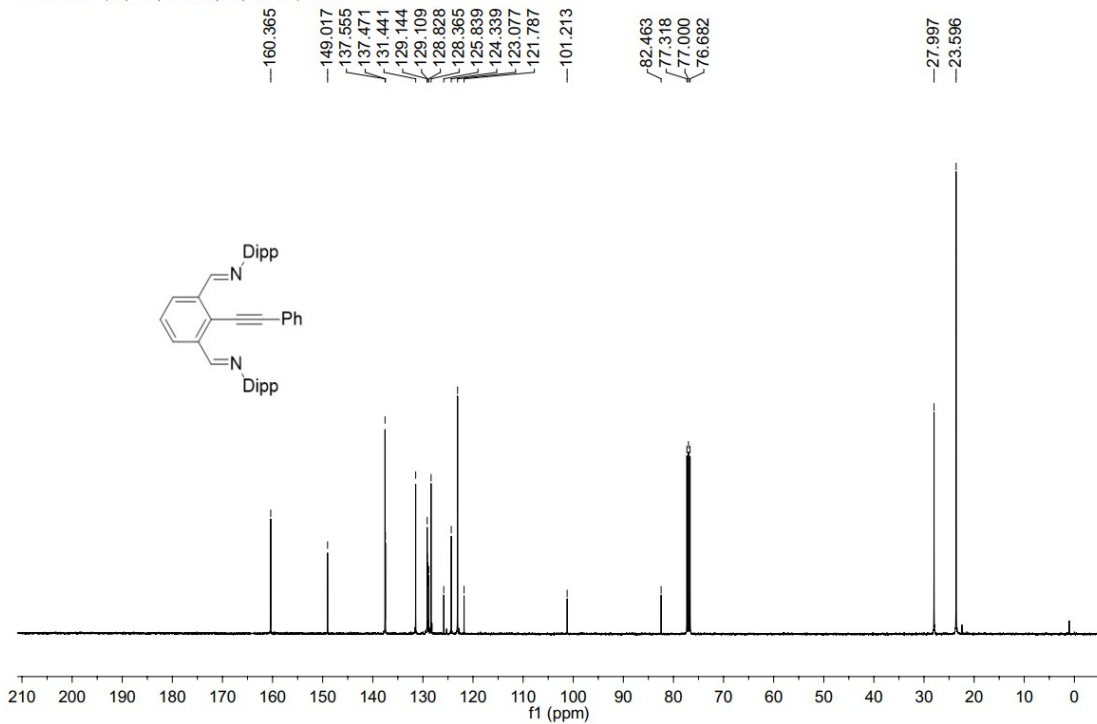

### **X-Ray Crystallography**

Each crystal was mounted on a glass fiber. Crystallographic measurements were made on a Bruker Smart Apex 100 CCD area detector using graphite monochromated Mo-K $\alpha$  radiation ( $\lambda_{\text{Mo-K}\alpha} = 0.71073$  Å). The structures were solved by directed methods (SHELXS-97) and refined on  $F^2$  by full-matrix least squares (SHELX-97) using all unique data. All the calculations were carried out with the SHELXTL18 program.

Key details of the crystal and structure refinement data are summarized in Table S1-S2. Further crystallographic details may be found in the respective CIF files, which were deposited at the Cambridge Crystallographic Data Centre, Cambridge. CCDC 1936618 (**2**), CCDC 1936631 (**5**), CCDC 1936630 (**7**), CCDC 1936627 (**8**), and CCDC 1936626 (**9**) contain the supplementary crystallographic data for this paper. These data can be obtained free of charge from The Cambridge Crystallographic Data Centre via [www.ccdc.cam.ac.uk/data\\_request/cif](http://www.ccdc.cam.ac.uk/data_request/cif).

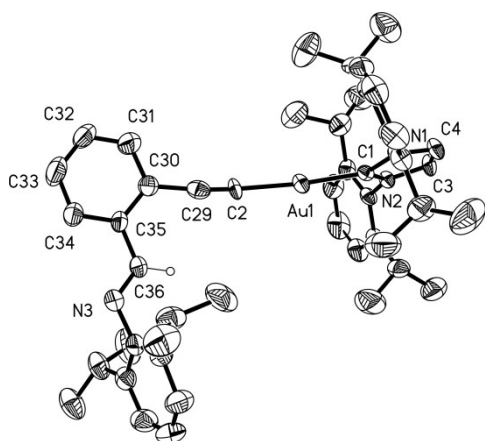

**Figure S1.** X-ray crystal structures of **2**. The hydrogen atoms have been omitted for clarity.

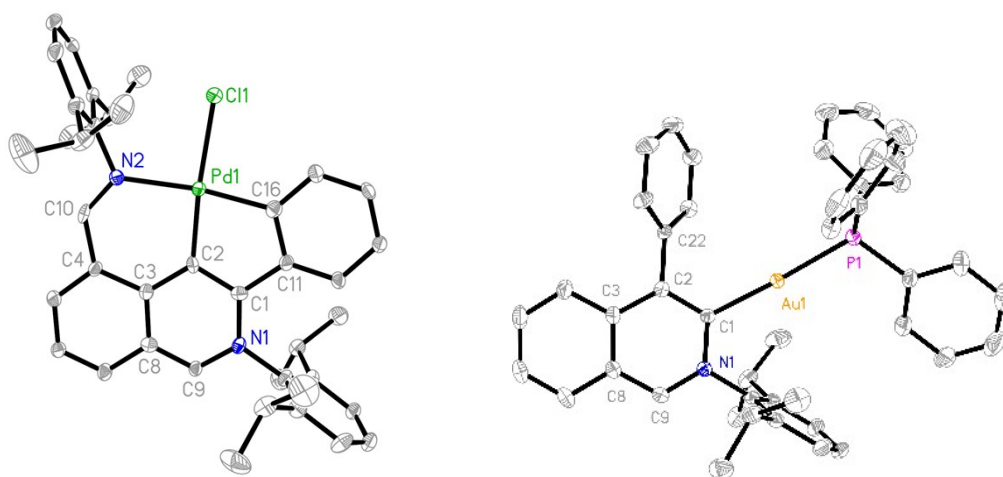

**Figure S2** X-ray crystal structures of **8** (left) and **9** (right). The counter anions and hydrogen atoms have been omitted for clarity.

**Table S1.** Crystal Data, Data Collection, and Structure Refinement for **2**, **5** and **7**.

|                     | <b>2</b>                                         | <b>5</b>                                                                          | <b>7</b>                                                                                            |
|---------------------|--------------------------------------------------|-----------------------------------------------------------------------------------|-----------------------------------------------------------------------------------------------------|
| Identification code | mo_d8v17144_0m                                   | wmj18009_0m                                                                       | mo_dd19079_0m                                                                                       |
| Formula             | C <sub>48</sub> H <sub>58</sub> AuN <sub>3</sub> | C <sub>63</sub> H <sub>78</sub> AuB <sub>2</sub> F <sub>8</sub> N <sub>5</sub> Pd | C <sub>59</sub> H <sub>70</sub> AuCl <sub>2</sub> F <sub>3</sub> NO <sub>5</sub> P <sub>3</sub> PdS |
| Formula weight      | 873.94                                           | 1341.39                                                                           | 1429.39                                                                                             |
| <i>T</i> , K        | 301.47                                           | 170.0                                                                             | 193(2)                                                                                              |
| crystal system      | Monoclinic                                       | Monoclinic                                                                        | Triclinic                                                                                           |
| space group         | P 1 21/n 1                                       | P 1 21/m 1                                                                        | P -1                                                                                                |
| <i>a</i> , Å        | 10.7970(12)                                      | 15.3922(2)                                                                        | 13.9859(4)                                                                                          |
| <i>b</i> , Å        | 16.6498(18)                                      | 14.4465(2)                                                                        | 14.7350(4)                                                                                          |
| <i>c</i> , Å        | 24.697(3)                                        | 16.7191(2)                                                                        | 15.1208(3)                                                                                          |
| $\alpha$ , deg      | 90                                               | 90                                                                                | 84.5370(10)                                                                                         |
| $\beta$ , deg       | 95.768(4)                                        | 115.7160(10)                                                                      | 82.4420(10)                                                                                         |

|                                                      |                                 |                                 |                                  |
|------------------------------------------------------|---------------------------------|---------------------------------|----------------------------------|
| $\gamma$ , deg                                       | 90                              | 90                              | 89.5620(10)                      |
| Volume, Å <sup>3</sup>                               | 4417.2(8)                       | 3349.50(8)                      | 3074.99(14)                      |
| Z                                                    | 4                               | 2                               | 2                                |
| $D_{\text{calc}}$ , Mg / m <sup>3</sup>              | 1.314                           | 1.371                           | 1.544                            |
| absorption<br>coefficient, mm <sup>-1</sup>          | 3.364                           | 4.657                           | 2.929                            |
| F(000)                                               | 1784                            | 1396                            | 1436                             |
| crystal size, mm                                     | 0.12 x 0.03 x 0.02              | 0.05 x 0.03 x 0.02              | 0.160 x 0.140 x 0.120            |
| 2 $\theta$ range, deg                                | 2.447 to 25.998                 | 2.839 to 52.980                 | 2.938 to 26.000                  |
| reflections<br>collected /unique                     | 43661/8678<br>[R(int) = 0.1217] | 36285/6170<br>[R(int) = 0.0494] | 47284/12027<br>[R(int) = 0.0293] |
| data / restraints/<br>parameters                     | 8678 / 12 / 482                 | 6170 / 64 / 412                 | 12027 / 0 / 698                  |
| goodness of<br>fit on F <sup>2</sup>                 | 1.045                           | 1.059                           | 1.023                            |
| final R indices<br>[ $I > 2\sigma(I)$ ] <sup>a</sup> | R1 = 0.0555,<br>wR2 = 0.0938    | R1 = 0.0390,<br>wR2 = 0.0901    | R1 = 0.0209,<br>wR2 = 0.0495     |
| R indices<br>(all data)                              | R1 = 0.1095,<br>wR2 = 0.1146    | R1 = 0.0442,<br>wR2 = 0.0929    | R1 = 0.0228,<br>wR2 = 0.0507     |
| largest diff peak<br>and hole, e/Å <sup>3</sup>      | 1.137 and -0.904                | 2.343 and -1.368                | 1.125 and -0.742                 |

**Table S2.** Crystal Data, Data Collection, and Structure Refinement for **8** and **9**.

|                     | <b>8</b>                                                          | <b>9</b>                                                            |
|---------------------|-------------------------------------------------------------------|---------------------------------------------------------------------|
| Identification code | mo_dd18042_0<br>m                                                 | mo_d8v19375_0m                                                      |
| Formula             | C <sub>41</sub> H <sub>45</sub> Cl <sub>3</sub> N <sub>2</sub> Pd | C <sub>46</sub> H <sub>42</sub> AuF <sub>3</sub> NO <sub>3</sub> PS |
| Formula weight      | 778.54                                                            | 973.80                                                              |
| T, K                | 173(2)                                                            | 193(2)                                                              |
| crystal system      | Monoclinic                                                        | Monoclinic                                                          |
| space group         | P 21/n                                                            | P 21/c                                                              |
| a, Å                | 8.822(2)                                                          | 14.4529(3)                                                          |
| b, Å                | 20.173(5)                                                         | 13.4595(3)                                                          |
| c, Å                | 21.011(6)                                                         | 21.5529(6)                                                          |
| $\alpha$ , deg      | 90                                                                | 90                                                                  |

|                                                      |                              |                                 |
|------------------------------------------------------|------------------------------|---------------------------------|
| $\beta$ , deg                                        | 93.993(11)                   | 93.9560(10)                     |
| $\gamma$ , deg                                       | 90                           | 90                              |
| Volume, Å <sup>3</sup>                               | 3730.0(17)                   | 3730.0(17)                      |
| $Z$                                                  | 4                            | 4                               |
| $D_{\text{calc}}$ , Mg / m <sup>3</sup>              | 1.386                        | 1.546                           |
| absorption<br>coefficient, mm <sup>-1</sup>          | 0.743                        | 3.660                           |
| F(000)                                               | 1608                         | 1944                            |
| crystal size, mm                                     | 0.140 x 0.100 x<br>0.050     | 0.120 x 0.100 x<br>0.070        |
| $2\theta$ range, deg                                 | 2.190 to 25.497              | 2.317 to 26.000                 |
| reflections<br>collected /unique                     | 6544/6544<br>[R(int) = ?]    | 20534/8206<br>[R(int) = 0.0275] |
| data / restraints/<br>parameters                     | 6544 / 0 / 433               | 8206 / 110 / 546                |
| goodness of<br>fit on F <sup>2</sup>                 | 1.033                        | 1.028                           |
| final R indices<br>[ $I > 2\sigma(I)$ ] <sup>a</sup> | R1 = 0.0746,<br>wR2 = 0.1728 | R1 = 0.0271,<br>wR2 = 0.0551    |
| R indices<br>(all data)                              | R1 = 0.0968,<br>wR2 = 0.1921 | R1 = 0.0373,<br>wR2 = 0.0593    |
| largest diff peak<br>and hole, e/Å <sup>3</sup>      | 1.766 and -<br>1.704         | 1.063 and -0.664                |

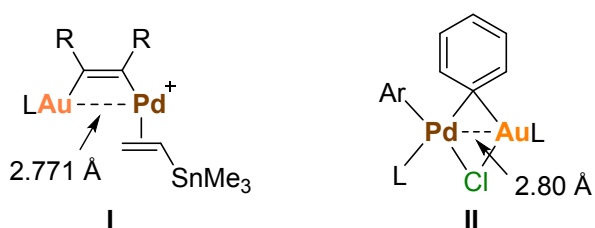

**Figure S3** Related Pd/Au intermediates **I** and **II**.

### Computational Details

The geometries of compounds have been optimized at wB97XD/6-31G(d)/LANL2DZ level. The subsequent frequency calculations on the stationary points were carried out at the same level of theory to ascertain the nature of the stationary points as minima on the respective potential energy surfaces. The conformational space of flexible systems has first been searched manually. Thermochemical corrections to 298.15 K have been calculated for all minima from unscaled vibrational frequencies obtained at this same level. All quantum mechanical calculations have been performed with Gaussian 09.

**Table S3.** The total energies, enthalpies and free energies of all species in gas phase shown in Scheme 7

|                  | $E_{\text{tot}}$ | $H_{298}$    | $G_{298}$    |
|------------------|------------------|--------------|--------------|
| <b>Int1</b>      | -2982.523813     | -2981.158668 | -2981.342231 |
| <b>PhI</b>       | -242.9473684     | -242.84916   | -242.887609  |
| <b>TS1</b>       | -3225.471182     | -3224.007828 | -3224.229840 |
| <b>Int2</b>      | -3225.450089     | -3223.982486 | -3224.201633 |
| <b>TS2</b>       | -3225.460457     | -3223.991230 | -3224.213267 |
| <b>TS2'</b>      | -3225.431501     | -3223.968147 | -3224.197012 |
| <b>Int3</b>      | -3225.458751     | -3223.995398 | -3224.190159 |
| <b>TS3</b>       | -3225.440266     | -3223.976912 | -3224.217410 |
| <b>Int4+IAuL</b> | -3225.485046     | -3224.021692 | -3224.198924 |

### Archive Entries

#### Int1

```
1\1\GINC-OM103\FOpt\RwB97XD\GenECP\C63H78Au1N5Pd1(2+)\WEIY\02-Mar-2020
\0\#p opt wb97xd/genecp\Title Card Required\2,1\Au,0.1225500717,0.1
935910938,0.2711735417\N,-0.1186776298,0.3457724887,3.287073821\N,4.74
38291741,-0.5135880396,1.7831218827\N,3.7272401336,-0.6545023364,-1.21
64355366\N,-0.7193686663,-0.8743232674,-2.4863538685\C,0.7356332198,0.
16638738,2.2256650424\C,2.0478116156,-0.0664957199,2.4968609244\C,2.56
68802009,-0.1497606552,3.7936158476\C,3.9328154891,-0.4115896441,4.094
0711838\C,4.3305231465,-0.4842160142,5.4156532769\C,3.4143033209,-0.30
36066963,6.4768451676\C,2.0953965171,-0.0458701805,6.2115362795\C,1.64
50234041,0.0346465246,4.8639339694\C,0.3027363528,0.287279592,4.551032
2333\C,4.9346183755,-0.5718797409,3.0512747894\C,-0.3896873573,0.18920
```

38921,-1.7193758621\C,-0.7826513919,-0.5090771862,-3.8187369658\C,-1.1  
944167877,-2.1520666051,-2.0061323942\C,-2.5869505025,-2.3273387708,-1  
.9274001841\C,-3.0524983554,-3.5856138342,-1.5488772173\C,-2.171032432  
1,-4.6204929245,-1.261891749\C,-0.8020349358,-4.4050311841,-1.31829289  
71\C,-0.2818067367,-3.1616548073,-1.6833678154\C,1.2186793371,-2.94409  
1731,-1.6842869997\C,1.9030429641,-3.6993125482,-2.8297852891\C,1.8152  
309505,-3.3353955125,-0.3266055965\C,-3.5639727677,-1.18289387,-2.1471  
906606\C,-4.8328189227,-1.5990335584,-2.8993972487\C,-3.9096293754,-0.  
5502451122,-0.7910423574\C,4.3456070056,-0.880568197,-2.162802506\C,5.  
1611197521,-1.1749368723,-3.3305046608\H,5.372927785,-0.6810177641,5.6  
523185795\H,3.765190435,-0.3682753652,7.5004710453\H,1.3862212223,0.09  
6258663,7.0215444694\H,-0.4521602355,0.4416352274,5.3142005374\H,5.956  
6976108,-0.7407717658,3.394607495\H,-1.0480502531,-1.2180378653,-4.586  
8501605\H,-4.12049679,-3.761996217,-1.4780011936\H,-2.5551301913,-5.59  
69937594,-0.9845894605\H,-0.1246310524,-5.218831859,-1.0786476996\H,1.  
4126534938,-1.8768152767,-1.8296760429\H,1.7325899499,-4.7784844419,-2  
.7541621288\H,2.9872388611,-3.5357880862,-2.7987480447\H,1.5299691749,  
-3.3688620488,-3.8046863117\H,1.287814966,-2.8374170964,0.4961765876\H  
,2.8700355508,-3.0521475786,-0.2873013981\H,1.7607227967,-4.4151694114  
, -0.1523182282\H,-3.0749666868,-0.4165709991,-2.7568321033\H,-4.594814  
0499,-2.1207760183,-3.8313343551\H,-5.422521729,-0.7108375052,-3.14698  
43863\H,-5.4729960733,-2.2524032987,-2.2976507736\H,-4.3756272111,-1.2  
900827244,-0.1308840553\H,-4.6126454698,0.2785191838,-0.9187018308\H,-  
3.018391567,-0.1643732425,-0.2822554009\H,6.1550537223,-1.4797415407,-  
2.990130209\H,5.2492237826,-0.2843055047,-3.957959198\H,4.7060588039,-  
1.9826442731,-3.9096025827\C,5.9113104161,-0.622626762,0.9375846403\C,  
6.6069725664,0.5526876989,0.6066571969\C,6.2755880043,-1.8903724741,0.  
4605682274\C,7.7195931152,0.4183146838,-0.2256819081\C,7.4021930926,-1  
.9666374923,-0.3603906498\C,8.1181558586,-0.8252224363,-0.7012679825\H  
,8.2922226274,1.2978074563,-0.4992774097\H,7.733140825,-2.9327954083,-  
0.7280989787\H,8.9984733172,-0.9056855589,-1.3314452614\C,5.5057476071  
, -3.1420515807,0.8490137901\C,6.15145638,-3.8204448179,2.0673418009\C,  
5.3670426835,-4.1378800662,-0.3083467788\H,4.4931154648,-2.8372921018,  
1.1402476893\H,6.1875788472,-3.1510546367,2.9339762547\H,5.5873318184,  
-4.7138098413,2.354033732\H,7.1793013291,-4.1239111494,1.8421263573\H,  
4.9833257587,-3.6526277565,-1.2132170772\H,6.3212465623,-4.6131483488,  
-0.5568206328\H,4.6706943015,-4.9362312657,-0.0339268025\C,6.202432179  
8,1.9139436107,1.1579384968\C,6.5447330781,3.0720360779,0.2111845932\C  
,6.8542618121,2.1750846754,2.5269509429\H,5.1133794242,1.9084239078,1.  
2980302226\H,6.2314216003,2.8724793745,-0.8178267513\H,6.0435673707,3.  
9842968019,0.5491694427\H,7.6194762595,3.2816232301,0.2037659007\H,6.5  
434997093,1.4515279415,3.2872782567\H,7.9453504968,2.1253412681,2.4480  
467618\H,6.5854786103,3.1722712216,2.8901852015\C,-1.5272474954,0.6002  
848741,3.0190500839\C,-1.9270582038,1.9300867257,2.8400735491\C,-2.381

7690956,-0.5044995065,2.9254591341\C,-3.2818184022,2.1404903925,2.5795  
019789\C,-3.7253889978,-0.2303045395,2.6683375508\C,-4.1707132003,1.07  
49006922,2.4993172623\H,-3.6463729541,3.1535216347,2.438946291\H,-4.43  
20410962,-1.0512088151,2.5950164759\H,-5.2207160746,1.2641605585,2.300  
6185964\C,-1.8980999546,-1.9390240188,3.0710535352\C,-2.1194997291,-2.  
7281658872,1.7739663324\C,-2.5613478027,-2.6305583593,4.2698062304\H,-  
0.8178302592,-1.9298232337,3.2549883981\H,-1.6264601516,-2.2496188697,  
0.9199864047\H,-1.7161980803,-3.7409565805,1.8718617389\H,-3.184394442  
7,-2.8164673606,1.5349921321\H,-2.3852770757,-2.0786208227,5.199150730  
8\H,-3.6445464616,-2.7135484831,4.1326661739\H,-2.1632173665,-3.642716  
8577,4.3918056132\C,-0.9593224315,3.1016833984,2.9075130922\C,-1.34539  
38845,4.0783782503,4.0267195596\C,-0.8599805215,3.8133861843,1.5515748  
136\H,0.0410018139,2.7193839459,3.1394796092\H,-1.4023095202,3.5740848  
31,4.997036866\H,-0.6048506409,4.8808606734,4.1005540803\H,-2.31863669  
89,4.5418006165,3.8345515967\H,-0.5480008107,3.1271419222,0.7554886365  
\H,-1.8203746218,4.249060076,1.2567252747\H,-0.1275368308,4.625316619,  
1.6012393293\C,-0.5047944759,0.8151654281,-3.8748467277\H,-0.470669931  
4,1.5050281618,-4.7029441015\N,-0.2741107998,1.2275174468,-2.576230737  
5\C,-0.1609990361,2.6159834537,-2.1976588988\C,-1.3502994945,3.3527761  
936,-2.0876867314\C,1.1060014099,3.1777473129,-2.0003847577\C,-1.23261  
20129,4.7170915777,-1.8195141787\C,1.1658717686,4.5440669763,-1.724897  
2795\C,0.010436502,5.3103800163,-1.6481569142\H,-2.1282527263,5.326232  
5208,-1.7472529811\H,2.1302539604,5.0210606325,-1.5818911546\H,0.07931  
91243,6.3753103625,-1.4502743413\C,-2.7279757399,2.7317217141,-2.25416  
94481\C,-3.3970050148,3.211941194,-3.5492292243\C,-3.6113569193,3.0030  
029627,-1.0303466051\H,-2.6140895917,1.6456751913,-2.3237822342\H,-2.7  
769830213,2.9933383891,-4.424907206\H,-4.364074335,2.7167438331,-3.684  
5712687\H,-3.5734342116,4.2926853574,-3.527043509\H,-3.1707564843,2.56  
93926238,-0.1268694888\H,-3.7583993491,4.0750426906,-0.8619003978\H,-4  
.6014042846,2.5588789332,-1.1747261311\C,2.3784853716,2.3573791565,-2.  
0844027965\C,3.2806599383,2.6086361072,-0.8730598986\C,3.1269114814,2.  
6232817782,-3.3967751857\H,2.1046711738,1.2977188695,-2.0690259161\H,2  
.7347177662,2.4524798256,0.0663864092\H,4.1348356748,1.9262198534,-0.8  
962996111\H,3.6807976954,3.6274864984,-0.8601306919\H,2.5083360046,2.3  
782940801,-4.2663031576\H,3.4193153731,3.6755748915,-3.4791464703\H,4.  
0414218451,2.0195612201,-3.4441196559\Pd,2.9192409867,-0.3063713795,0.  
7958121312\\Version=ES64L-G16RevA.03\State=1-A\HF=-2982.5238132\RMSD=4  
.066e-09\RMSF=1.029e-06\Dipole=2.0248539,-0.5036371,1.1938804\Quadrupo  
le=25.9426612,-38.6938859,12.7512247,-11.182512,6.2151453,1.4096442\PG  
=C01 [X(C63H78Au1N5Pd1)]\@

**PhI**

1\1\GINC-OM103\FOpt\RwB97XD\GenECP\C6H5I1\WEIY\09-Apr-2020\0\#p wb97x  
d/genecp opt freq\Title Card Required\0,1\C,-2.6088041057,0.90548932



99,0.0118478752\C,-1.2156270882,0.8973831084,0.0123568948\C,-0.5335084  
737,2.1095163616,0.0118150202\C,-1.215530173,3.3217331602,0.0107982842  
\C,-2.6086821402,3.3137541911,0.0103130029\C,-3.3067753145,2.109641771  
1,0.0108230049\H,-3.1462133736,-0.0380855848,0.0122609935\H,-0.6744833  
48,-0.0422719402,0.0131517422\H,-0.6742714545,4.2613228873,0.010389873  
\H,-3.1460401607,4.2573579101,0.0095186253\H,-4.392322555,2.1097093897  
,0.0104289727\I,1.5973877472,2.1094620254,0.012586519\\Version=ES64L-G  
16RevA.03\State=1-A\HF=-242.9473684\RMSD=4.381e-09\RMSF=2.250e-05\Dipo  
le=-0.7785806,0.0000266,-0.0002781\Quadrupole=3.3516931,1.8735994,-5.2  
252925,-0.0000224,0.003091,-0.004545\PG=C01 [X(C6H5I1)]\@

**TS1**

1\1\GINC-OM103\FTS\RwB97XD\GenECP\C67H80Au1I1N4Pd1(2+)\WEIY\15-Mar-202  
0\0\#p opt=(calcf,ts,noeigen) wb97xd/genecp\\Title Card Required\\2,  
1\Au,0.084518123,-0.0288420914,0.0201905075\N,-0.1066598075,0.20905751  
35,3.056984775\N,4.8342345095,0.2582531929,1.566232364\N,-0.6998362855  
, -0.8075219402, -2.961347631\C,0.752006612,0.1338132499,1.9762185669\C,  
2.0754542975,0.313251394,2.2395268947\C,2.5971318184,0.6542867995,3.49  
4099582\C,3.9725748227,0.8823169089,3.7699866449\C,4.3587694206,1.2453  
067649,5.0469587555\C,3.4234389095,1.380297314,6.0964887406\C,2.096365  
5445,1.1356851205,5.8633677284\C,1.6607976188,0.7733453832,4.558742509  
7\C,0.3170514225,0.501004791,4.2859925421\C,5.0019267725,0.672307204,2  
.7693689032\C,-0.5520870842,0.1040127704,-1.9646253054\C,-1.0436431295  
, -0.1791411401, -4.1449144357\C,-0.691348141,-2.2466811816,-2.821260324  
\C,-1.739543542,-2.836427748,-2.0842119891\C,-1.7031864192,-4.22211569  
17,-1.9347538045\C,-0.7109506554,-4.9873177612,-2.5376435227\C,0.24878  
45646,-4.3832591297,-3.3330404893\C,0.2819870225,-2.996576446,-3.50164  
55002\C,1.2860869831,-2.392638178,-4.475924749\C,0.7732707585,-2.53270  
18567,-5.9222670606\C,2.6780438236,-3.0387340661,-4.4035301341\C,-2.94  
06674844,-2.0316596971,-1.5891745512\C,-3.8413630865,-1.6365375548,-2.  
7741669691\C,-3.7962439242,-2.763038355,-0.5534934097\H,5.4107631861,1  
.4191730814,5.2574386885\H,3.7656408344,1.6647162397,7.0849132013\H,1.  
3683331003,1.2189389016,6.6647971714\H,-0.440073541,0.5067222275,5.062  
3314776\H,6.0275984004,0.8445415822,3.0984687412\H,-1.2367515459,-0.73  
43468156,-5.0460742363\H,-2.4772155796,-4.7213808331,-1.3635946473\H,-  
0.7109709496,-6.0655547556,-2.4133019282\H,0.9883672978,-4.9978065741,  
-3.8352637068\H,1.3972615048,-1.3258460568,-4.2464477968\H,0.698829302  
1,-3.5914395814,-6.1920536942\H,1.4686939888,-2.0548400678,-6.61979258  
93\H,-0.2160898681,-2.0954256518,-6.0775876452\H,3.0150795382,-3.18903  
58442,-3.3777707066\H,3.4086910111,-2.4041329665,-4.9150267127\H,2.691  
3925965,-4.012621411,-4.9035046667\H,-2.5805562862,-1.1133443141,-1.11  
41347231\H,-3.3210529376,-1.0332978919,-3.521975618\H,-4.6994104708,-1  
.0563004626,-2.4171721812\H,-4.2255004455,-2.5329347973,-3.2726836154\  
H,-4.3488474939,-3.5961590929,-1.0011971793\H,-4.5328017266,-2.0682203

048,-0.138052216\H,-3.1976569328,-3.1490715103,0.2730483057\C,6.048979  
9729,-0.0145699897,0.8281655916\C,6.6090171683,1.0093017191,0.05043220  
9\C,6.6559151711,-1.2719997909,0.9999906883\C,7.8285022066,0.744213239  
1,-0.5747240866\C,7.8879863004,-1.4692311678,0.3761050374\C,8.46755874  
38,-0.477149694,-0.4060728485\H,8.3029151816,1.5159652435,-1.172405943  
9\H,8.4136029073,-2.4088326084,0.5163477859\H,9.4308488201,-0.65281763  
39,-0.8745517944\C,6.0554966031,-2.3450526055,1.90298409\C,6.661779111  
9,-2.2408435193,3.3149632488\C,6.2196834103,-3.790603217,1.3701680692\  
H,4.9811291614,-2.1440464721,1.989909334\H,6.5095605742,-1.2545230115,  
3.7660048826\H,6.2091831569,-2.9849264514,3.9780082617\H,7.7410188079,  
-2.4240808953,3.2836192844\H,5.2473364476,-4.2392150985,1.1469689509\H  
,6.8235943297,-3.845436607,0.4610447189\H,6.7072058373,-4.4317118776,2  
.1102439007\C,5.9868315725,2.3944371464,-0.008924263\C,6.0021263652,3.  
0104382233,-1.4114907775\C,6.6816674306,3.3289246148,0.9947612312\H,4.  
939857297,2.3059230648,0.3003426156\H,5.52375334,2.3514249126,-2.14242  
88317\H,5.4622204068,3.9629292502,-1.4063943972\H,7.0196280935,3.21898  
72873,-1.7567948635\H,6.6260545029,2.9412150267,2.0182180812\H,7.74136  
99511,3.4481739156,0.7457163059\H,6.2156918499,4.3196185599,0.98296325  
37\C,-1.5203232392,-0.0942212043,2.8927340139\C,-2.4399116609,0.966878  
6117,2.9257147927\C,-1.8637795929,-1.44780743,2.7874057928\C,-3.782895  
661,0.6079037246,2.8064391148\C,-3.2246146103,-1.737308346,2.680948221  
\C,-4.1694252293,-0.7220182519,2.678989841\H,-4.5484131269,1.373745887  
1,2.8187928517\H,-3.5497126979,-2.7707513177,2.6223331188\H,-5.2237411  
196,-0.9672259472,2.5992359846\C,-0.8391469774,-2.5691868511,2.8993448  
952\C,-0.9865801999,-3.623934215,1.7987173156\C,-0.9173814213,-3.20489  
6774,4.2961317266\H,0.1647593394,-2.148431938,2.7863011595\H,-0.921438  
1047,-3.1760896948,0.8009248703\H,-0.1889980215,-4.368979756,1.8937920  
53\H,-1.9356463641,-4.1653013065,1.8724496101\H,-0.7642260797,-2.45994  
03635,5.0850256307\H,-1.8956395737,-3.6681274269,4.4628926522\H,-0.152  
8042714,-3.9804682757,4.4068173909\C,-2.007164948,2.4235730116,3.11033  
26057\C,-3.1867299419,3.375176967,3.3324900364\C,-1.1446291275,2.94394  
74983,1.9474948325\H,-1.3966005684,2.4738205404,4.0232314478\H,-3.8276  
976453,3.0570328482,4.1600047117\H,-2.8074848688,4.3727518342,3.571149  
088\H,-3.8014647254,3.4674551208,2.4297184005\H,-0.1498486881,2.493467  
3527,1.9136338929\H,-1.631879016,2.7578128689,0.986884967\H,-1.0045764  
547,4.0246441794,2.0430164941\C,-1.1115693269,1.1435286597,-3.88789175  
08\H,-1.3688529641,1.9841572429,-4.5122104259\N,-0.8212519748,1.297253  
8058,-2.5473697973\C,-1.0218389921,2.5620039081,-1.8875251593\C,-2.346  
2793469,2.930406643,-1.6018572469\C,0.0757444565,3.3943179278,-1.65250  
85575\C,-2.5508373013,4.2089718712,-1.0832730325\C,-0.1820396457,4.659  
9298285,-1.1228341761\C,-1.4820640831,5.0686073212,-0.8553469026\H,-3.  
5587226227,4.5385433672,-0.8521021308\H,0.6425639964,5.341674013,-0.93  
7063673\H,-1.6651770301,6.0635500536,-0.4619870163\C,-3.5084475925,1.9  
643199672,-1.7750494509\C,-4.726093062,2.6022697322,-2.4517097859\C,-3

.8769060569,1.3600499336,-0.4142490587\H,-3.18512843,1.1385426778,-2.4151854694\H,-4.4558219494,3.0678994109,-3.4044302014\H,-5.4837403534,1.8373723052,-2.6495198468\H,-5.1930508644,3.3667263899,-1.8219619924\H,-3.0173630254,0.8647318137,0.0514343332\H,-4.2257968783,2.1372895689,0.2754812483\H,-4.6774439446,0.619558857,-0.5203717104\C,1.4926867109,2.9612042847,-1.972931949\C,2.4090171508,3.1007556121,-0.7551533903\C,2.054205554,3.7221905618,-3.1807850235\H,1.4680252849,1.8976565062,-2.2343238925\H,1.9718775899,2.6233298424,0.1300340397\H,3.3698137832,2.6253504707,-0.9696394362\H,2.6077665201,4.1493847984,-0.5075843974\H,1.4393206424,3.5633107388,-4.0722951577\H,2.0904853676,4.7993963051,-2.9862597191\H,3.0751031185,3.3908201069,-3.4046446393\I,2.3705645305,-3.3259851162,-0.1986619363\Pd,3.0171799676,-0.0723736789,0.6037368073\C,3.6223936935,-1.9931723514,-1.2876341655\C,4.9485463571,-2.3459292404,-1.5283425364\C,3.0838228884,-0.8283051806,-1.8518020938\C,5.7379371941,-1.5242312486,-2.3236808011\H,5.3560233378,-3.2621944579,-1.1212636433\C,3.9049869123,0.0038551651,-2.6248872122\H,2.014847447,-0.641544147,-1.8221974672\C,5.2276991059,-0.3431453695,-2.8598692341\H,6.767460323,-1.8055517659,-2.5149475696\H,3.479650176,0.8989401976,-3.0694632582\H,5.8598839526,0.2900296716,-3.4730614035\\Version=ES64L-G16RevA.03\State=1-A\HF=-3225.450089\RMSD=2.698e-09\RMSF=2.246e-06\Dipole=1.2261561,1.666327,2.4183397\Quadrupole=27.7301803,-37.353498,9.6233177,-3.3208984,8.4627313,13.2287829\PG=C01 [X(C67H80Au1I1N4Pd1)]\@

## Int2

1\1\GINC-OM115\FOpt\RwB97XD\GenECP\C69H83Au1I1N5Pd1(2+)\WEIY\23-Aug-2019\0\\#p opt wb97xd/genecp\\Title Card Required\\2,1\Au,0.0023934297,-0.0428499859,-0.0341507723\N,-0.0085577349,-0.0894205608,2.9262160107\N,5.3209274127,-0.0123985756,2.3729537911\N,5.2599651489,0.6557976218,-0.5341843664\N,-1.5212286956,-1.1187726722,-2.5474129989\C,0.9157420123,-0.1389515072,1.8827846965\C,2.2465826567,-0.3456433706,2.2992337424\C,2.601087611,-0.6095976654,3.6529406276\C,3.9182514291,-0.7648334235,4.2223911034\C,4.0776208959,-1.1446573779,5.5477234308\C,2.9987064027,-1.3482290852,6.4254742626\C,1.7412323235,-1.1036196389,5.9570999014\C,1.5410584291,-0.7258401564,4.600471058\C,0.2609294105,-0.3925806183,4.1885662601\C,5.1653500903,-0.4894123509,3.5492115255\C,-0.83816843,-0.1173641807,-1.9324333996\C,-1.7452042236,-0.8213613878,-3.8804374237\C,-2.1930053179,-2.258715615,-1.966656212\C,-3.5634650858,-2.1131587183,-1.6916861034\C,-4.2509691666,-3.2454077749,-1.2565104651\C,-3.6032188807,-4.4665011692,-1.1189654755\C,-2.2527572321,-4.5805504899,-1.4173958297\C,-1.5165043188,-3.4800684325,-1.8603691864\C,-0.0715575851,-3.6365916211,-2.2956109215\C,-0.0041038588,-4.1136827299,-3.7547496267\C,0.7191710663,-4.5764798373,-1.3801451906\C,-4.2796144473,-0.7775571215,-1.8201985711\C,-5.701707755,-0.9043436625,-2.3780014611\C,-4.2831587465,-0.0648739624,-0.4639555766\C,6.1027980571,0.9239363171,-1.271

813561\C,7.1729592762,1.2616930065,-2.1949389105\H,5.0852190291,-1.271  
6206624,5.933918122\H,3.1750289166,-1.6531853546,7.4500566013\H,0.8745  
568561,-1.1947259557,6.60540469\H,-0.5692975782,-0.3527188245,4.884102  
8966\H,6.0734991825,-0.6916018507,4.1192215047\H,-2.2938145644,-1.4945  
070676,-4.5194656817\H,-5.3096821208,-3.176532526,-1.0301567016\H,-4.1  
594910619,-5.3380925352,-0.7883301533\H,-1.7682973078,-5.5465058551,-1  
.3246753796\H,0.4001173258,-2.6502840082,-2.2459160658\H,-0.473348947,  
-5.0974795853,-3.8649296116\H,1.0382703319,-4.1961876121,-4.0808250495  
\H,-0.5153033587,-3.4199460413,-4.4303781784\H,0.6466889231,-4.2660464  
683,-0.3324696228\H,1.7767031487,-4.5750722275,-1.6641449677\H,0.37082  
81509,-5.6113747836,-1.4604523075\H,-3.7234706111,-0.150559625,-2.5241  
539156\H,-5.7206129156,-1.4853680667,-3.305122299\H,-6.1046193944,0.09  
1117669,-2.5905509027\H,-6.3824628028,-1.3805807935,-1.6645697024\H,-4  
.8151058452,-0.6698511258,0.2778339551\H,-4.7900832786,0.9033000833,-0  
.5349494611\H,-3.2666990117,0.1058612887,-0.0920900601\H,7.7839264229,  
2.0582819434,-1.762631276\H,6.7486523101,1.5942257291,-3.1460097134\H,  
7.7985470666,0.3805810539,-2.3589893331\C,6.6581381596,0.0651427056,1.  
8381762529\C,7.357758686,1.2801249228,1.8881291128\C,7.180925147,-1.09  
83305017,1.2402428559\C,8.6283339351,1.3086253341,1.3111638198\C,8.459  
9891168,-1.0135015043,0.6924593852\C,9.1757938867,0.1781568128,0.71817  
31429\H,9.2040281854,2.2289339865,1.3382003108\H,8.906098336,-1.892779  
4575,0.2392984959\H,10.1698088166,0.2215290389,0.2837804388\C,6.419572  
7055,-2.4156386758,1.1921909587\C,6.9043843073,-3.358963841,2.30336442  
01\C,6.5013717076,-3.0928620433,-0.1803544033\H,5.355971583,-2.2155171  
815,1.3720771901\H,6.7924346604,-2.9115328548,3.2978833524\H,6.3358291  
807,-4.2941865522,2.2861002394\H,7.9637186916,-3.6032133321,2.17043797  
67\H,6.2135520359,-2.4040224043,-0.9809627057\H,7.5072321041,-3.469794  
5869,-0.3909438636\H,5.8192965011,-3.9476726686,-0.2117616806\C,6.7910  
810908,2.5356560565,2.5234534234\C,6.4533744281,3.5868926681,1.4570484  
182\C,7.7304899079,3.1086420962,3.5933997488\H,5.8571106543,2.27005484  
86,3.0227435705\H,5.7313159482,3.2005808125,0.7300718277\H,6.017611973  
1,4.4749376642,1.9251163565\H,7.3549977052,3.9017270863,0.9191334836\H  
,7.9890328629,2.3546121355,4.3438144714\H,8.6635124969,3.481232034,3.1  
583522396\H,7.2500687801,3.949772636,4.1032120321\C,-1.3884311288,0.33  
61528999,2.7147389275\C,-1.6337746167,1.7147292194,2.6439388108\C,-2.3  
857054774,-0.6418144559,2.7906523416\C,-2.9731644665,2.1034214551,2.63  
0004846\C,-3.7051259577,-0.1891156766,2.784360733\C,-3.9963610985,1.1  
651883033,2.7032076991\H,-3.2249591391,3.1577295514,2.5891633565\H,-4.  
5155446263,-0.9088676955,2.8449618557\H,-5.0298881094,1.4960538437,2.7  
037698208\C,-2.0809877815,-2.1277149687,2.894931021\C,-2.6485303353,-2  
.8864192132,1.6939572923\C,-2.5925148057,-2.7128050526,4.2187661569\H,  
-0.9951677917,-2.2702695703,2.8646426357\H,-2.2529250411,-2.4857139694  
,0.7567124524\H,-2.3809428847,-3.9459628476,1.7518133218\H,-3.74059565  
72,-2.8209620964,1.6539066149\H,-2.1851765495,-2.1842162057,5.08854728

07\H,-3.6839905842,-2.6543447013,4.2831827599\H,-2.3117439521,-3.76752  
58077,4.2993210492\C,-0.5153785716,2.7466137186,2.7202208578\C,-0.3636  
740906,3.2291860764,4.1716183814\C,-0.7080544264,3.9268100587,1.764435  
8137\H,0.4265478314,2.2696432376,2.4306370058\H,-0.1864384163,2.394493  
3589,4.8602755893\H,0.4815342015,3.9206561757,4.2546103309\H,-1.266135  
3554,3.7506828244,4.508093411\H,-0.6287365128,3.6059506102,0.721582219  
9\H,-1.6720001259,4.4262698846,1.9017073934\H,0.070548006,4.6719285814  
,1.9457364641\C,-1.2084758812,0.3936398401,-4.1073873446\H,-1.19550208  
58,1.0169227927,-4.9859413189\N,-0.6477627063,0.804603079,-2.912069518  
2\C,-0.146314373,2.1404333508,-2.7379243907\C,-1.0534981555,3.11441016  
14,-2.2941351106\C,1.1697874817,2.4294076191,-3.1291632145\C,-0.579333  
4872,4.4235805196,-2.1856642321\C,1.5868345688,3.7567471137,-3.0161452  
594\C,0.7239300643,4.7412932023,-2.544487123\H,-1.2500729081,5.2108067  
723,-1.8553947987\H,2.5918669847,4.0329418957,-3.3191193514\H,1.064772  
6838,5.7708220966,-2.4813245247\C,-2.5298551123,2.8089487557,-2.083348  
9001\C,-3.3422254063,3.3831275278,-3.2549292339\C,-3.0685185398,3.3020  
660645,-0.7397547429\H,-2.6624087851,1.7244632514,-2.0916307434\H,-2.9  
672689219,3.0234229113,-4.2187645889\H,-4.3927842485,3.0873450564,-3.1  
658231576\H,-3.2987780622,4.4776517205,-3.2659514096\H,-2.6164880778,2  
.7457908496,0.0843850675\H,-2.8839342874,4.3703325389,-0.5835771966\H,  
-4.1513952805,3.1480694592,-0.6934442184\C,2.0739198522,1.3680707918,-  
3.7384775294\C,3.5497397041,1.5553598143,-3.3749887571\C,1.9348401305,  
1.3467632323,-5.2700099067\H,1.760181446,0.3934476797,-3.3481449993\H,  
3.686931177,1.7113756281,-2.3033054355\H,4.1105509275,0.658492346,-3.6  
593636974\H,3.9898305763,2.4077132236,-3.9058354349\H,0.9169039396,1.1  
18470998,-5.5925194692\H,2.2121533934,2.3182669212,-5.6938649366\H,2.5  
956415345,0.5863971693,-5.6990956854\Pd,3.7607124622,0.0097390936,0.98  
99428019\I,2.8336067244,-1.5943723694,-0.8975054517\C,3.2234475277,1.9  
28490705,1.4220628128\C,3.4015038728,2.4999569781,2.6664316622\C,2.729  
2042553,2.5990246342,0.3227886669\C,3.15316308,3.8690507613,2.78508062  
76\H,3.7236604768,1.9332368363,3.5304287795\C,2.499180005,3.9692107355  
,0.4671671708\H,2.5146480148,2.1070545077,-0.6196929071\C,2.726841992,  
4.6036717127,1.6840139205\H,3.3024153989,4.3495980305,3.7471171666\H,2  
.1210229382,4.520488955,-0.3861619648\H,2.5459837891,5.6693592909,1.77  
93885393\\Version=ES64L-G09RevE.01\State=1-A\HF=-3225.460457\RMSD=4.0  
94e-09\RMSF=2.130e-06\Dipole=3.2545554,1.1882611,2.833993\Quadrupole=4  
7.6826574,-47.2281363,-0.4545211,13.0994719,14.6039996,-10.8942154\PG=  
C01 [X(C69H83Au1I1N5Pd1)]\@

## TS2

1\1\GINC-OM103\FTS\RwB97XD\GenECP\C67H80Au1I1N4Pd1(2+)\WEIY\10-Mar-202  
0\0\#p opt=(calcfc,ts,noeigen) wb97xd/genecp\\Title Card Required\2,  
1\Au,-0.0469055339,0.1299904616,-0.0235183746\N,-0.0103831426,0.055836  
4537,3.0125727316\N,5.1878424426,-0.1176071318,1.7722810542\N,-0.57426

80429,-0.8197069168,-2.8948243345\C,0.8215822628,0.0951284648,1.902926  
284\C,2.1753556455,0.1265701435,2.2046219889\C,2.7322882497,0.12096353  
66,3.5161857066\C,4.1068082402,0.0160598045,3.9302201131\C,4.42635896,  
0.0722266379,5.2766095127\C,3.4684008786,0.2449307715,6.293337202\C,2.  
1527390502,0.3214339604,5.9417994128\C,1.7746585055,0.2426942715,4.572  
8863637\C,0.4195606328,0.1749325939,4.2611923509\C,5.2498558221,-0.160  
5534221,3.0416623378\C,-0.8094588825,0.1384513877,-1.9558589325\C,-1.1  
005234307,-0.445219432,-4.1187263289\C,-0.0580574965,-2.1478436593,-2.  
6477995633\C,-0.874218676,-3.0425222735,-1.9212420964\C,-0.3463944996,  
-4.3018739596,-1.6454713902\C,0.9038506817,-4.680474789,-2.1238972078\  
C,1.6330911604,-3.815323283,-2.9254248985\C,1.1674317726,-2.5286616375  
, -3.2118617389\C,1.9515730487,-1.6571743262,-4.1823469411\C,1.70731325  
27,-2.1269088793,-5.627498317\C,3.4637662029,-1.6467965341,-3.90371726  
46\C,-2.3279174989,-2.7197489395,-1.5919476562\C,-3.1917483145,-2.9011  
096167,-2.8533325516\C,-2.9247668115,-3.5498232525,-0.4560245947\H,5.4  
70085813,-0.0205065665,5.563797929\H,3.7783202892,0.2966016022,7.33047  
23444\H,1.3767896403,0.4271205561,6.6940358441\H,-0.3405213044,0.14472  
85122,5.0338667445\H,6.2168626337,-0.3269857601,3.5212942199\H,-1.0338  
620712,-1.082144223,-4.9849228173\H,-0.9302095506,-5.0145490645,-1.074  
2677589\H,1.2884199716,-5.672020848,-1.9063738293\H,2.5796833279,-4.14  
49681642,-3.341150494\H,1.5774274795,-0.6292200963,-4.1055484364\H,2.0  
80657464,-3.1469006598,-5.7666804337\H,2.2300301276,-1.4755506483,-6.3  
353154813\H,0.6453028349,-2.1320191996,-5.8898088177\H,3.6978917626,-1  
.4840862253,-2.8468927114\H,3.9476997232,-0.861239046,-4.4938698359\H,  
3.9271922666,-2.5945357947,-4.195173108\H,-2.3875610332,-1.6745900422,  
-1.2798883614\H,-2.8646549255,-2.2674424962,-3.6820092772\H,-4.2354591  
134,-2.6505463387,-2.6343299714\H,-3.1584552539,-3.9427287518,-3.19039  
43175\H,-3.0081585856,-4.6100689141,-0.7177643845\H,-3.936372218,-3.19  
32709654,-0.2406218519\H,-2.3411376749,-3.4575170217,0.4591976297\C,6.  
3439844592,-0.3184386166,0.9475322584\C,6.8311899097,0.7981194602,0.23  
62971213\C,6.9101085591,-1.6017304386,0.8344511963\C,7.9193737902,0.59  
6750961,-0.6096296761\C,8.002303886,-1.7376595909,-0.0243800159\C,8.49  
86872106,-0.6595863602,-0.7427320694\H,8.3332226741,1.4319039074,-1.16  
35689621\H,8.4746332839,-2.7087021598,-0.1313954305\H,9.3489378879,-0.  
7952058388,-1.4032082523\C,6.4157619095,-2.8078653498,1.6195489338\C,7  
.3530202986,-3.104819987,2.8014385797\C,6.2593188387,-4.054453793,0.73  
80755462\H,5.4228657466,-2.5790831286,2.0210556686\H,7.4525748722,-2.2  
478702143,3.4774652402\H,6.979884349,-3.9553043625,3.3811761759\H,8.35  
85283128,-3.3545538795,2.4464824225\H,5.6681421802,-3.8385552531,-0.15  
67362162\H,7.2284289172,-4.4515689728,0.4191896523\H,5.7545287063,-4.8  
454834235,1.3017252738\C,6.2774390687,2.195661762,0.4782449033\C,6.396  
3328904,3.1221549275,-0.734539616\C,6.9500125422,2.822980954,1.7094706  
054\H,5.2042026384,2.114266741,0.7071668571\H,5.9869043921,2.657236816  
1,-1.6371808472\H,5.8462219982,4.0494384576,-0.5462620271\H,7.43603893

16, 3.4021613151, -0.9315104723\H, 6.8106105054, 2.2087096079, 2.6059325193  
\H, 8.0272440861, 2.9271383107, 1.5430617508\H, 6.5382524312, 3.8175932685,  
1.9106924164\C, -1.3935909071, -0.3788996192, 2.8666680425\C, -2.404254246  
9, 0.5794747366, 2.7941598496\C, -1.601498189, -1.7650782354, 2.9216380181\  
C, -3.7123857804, 0.094927869, 2.7547486517\C, -2.9285402685, -2.1891126961  
, 2.8589070133\C, -3.9697058274, -1.270547314, 2.776138855\H, -4.540253932,  
0.7951818824, 2.706791241\H, -3.1536809294, -3.2503084774, 2.9031389284\H,  
-4.9953465917, -1.6238029291, 2.7421389875\C, -0.4667237938, -2.7555881633  
, 3.1627849731\C, -0.426380286, -3.9053364282, 2.1535214047\C, -0.541092857  
, -3.2857720789, 4.6036287896\H, 0.4898647042, -2.2351523016, 3.0520762523\  
H, -0.3006192351, -3.5287737014, 1.134039396\H, 0.4247284637, -4.5569338164  
, 2.3768073268\H, -1.3305861929, -4.5219057838, 2.1942604842\H, -0.52440982  
68, -2.4718943485, 5.3378199808\H, -1.4624847978, -3.8547553345, 4.76585358  
6\H, 0.3052574613, -3.9484713891, 4.8102567474\C, -2.1089632732, 2.06875426  
72, 2.8160230483\C, -2.5335220089, 2.6824990094, 4.1579946513\C, -2.7590915  
854, 2.7931130367, 1.6365043814\H, -1.0255964679, 2.2057199475, 2.712621803  
5\H, -2.040017474, 2.1917755539, 5.0047764992\H, -2.2819848116, 3.747321140  
2, 4.188041405\H, -3.6143306438, 2.5882216768, 4.3071494418\H, -2.436346264  
5, 2.3627005586, 0.6842009389\H, -3.8516295148, 2.7384905605, 1.6772552822\  
H, -2.4831629664, 3.8521755085, 1.643401046\C, -1.679493798, 0.7588380549, -  
3.9427572107\H, -2.2364542303, 1.38919364, -4.6172782391\N, -1.5001567154,  
1.1056368138, -2.6137632708\C, -2.3104348366, 2.1676757097, -2.0514911156\  
C, -3.6505046981, 1.8463079639, -1.7823846272\C, -1.8007989446, 3.470604898  
4, -1.9304779867\C, -4.4896292846, 2.8732431037, -1.3480790747\C, -2.686252  
1186, 4.4560442787, -1.4909730451\C, -4.0144145266, 4.1658604832, -1.204517  
449\H, -5.5298666222, 2.6554705462, -1.1270110787\H, -2.3442371733, 5.47696  
53376, -1.3766427012\H, -4.679916471, 4.9571469872, -0.8742703054\C, -4.215  
4258282, 0.4435529464, -1.9271395228\C, -5.456662854, 0.408311681, -2.82702  
28527\C, -4.4994605392, -0.1488910877, -0.5436673602\H, -3.4665799794, -0.1  
917343217, -2.4049355261\H, -5.2494551782, 0.8481182806, -3.8077285294\H, -  
5.7780926909, -0.6271206028, -2.9799358128\H, -6.2991370098, 0.9511811203,  
-2.3865178414\H, -3.5861986697, -0.1954759524, 0.0585430702\H, -5.23109873  
32, 0.4560938659, 0.0038189434\H, -4.9053346836, -1.1621310285, -0.63377544  
47\C, -0.3678440677, 3.8212915489, -2.3060463358\C, 0.0939345661, 5.1430072  
958, -1.6849046574\C, -0.1889450535, 3.894149304, -3.8317561747\H, 0.279843  
3172, 3.0202637228, -1.9274749032\H, -0.0100479075, 5.1439669378, -0.594206  
541\H, 1.1422456698, 5.3231870684, -1.9315674634\H, -0.466383215, 5.9934505  
832, -2.0858737548\H, -0.3746479063, 2.9341550592, -4.319699697\H, -0.86881  
03099, 4.6362894954, -4.2638601321\H, 0.8357488986, 4.1949642884, -4.076119  
8896\I, 2.7666039315, -2.256371884, 0.193344552\C, 2.3101631872, 1.31613666  
94, -0.6173919748\Pd, 3.421602669, 0.2525337391, 0.6523862947\C, 2.54023908  
69, 1.1309180024, -1.9750945682\C, 2.3909879246, 2.5657711576, 0.0090240002  
\C, 2.958632582, 2.2303586449, -2.7201425229\H, 2.444933645, 0.1503679876, -  
2.4178623652\C, 2.8480052419, 3.6444134186, -0.7606057361\H, 2.0904681146,

2.7164260161,1.0405537892\C,3.1370547706,3.4737351195,-2.1082444414\H,  
3.1783470221,2.1025215407,-3.7756214416\H,2.9320552129,4.6231722571,-0  
.2995732902\H,3.486673282,4.3167082397,-2.6951848587\\Version=ES64L-G1  
6RevA.03\State=1-A\HF=-3225.438353\RMSD=4.990e-09\RMSF=7.104e-07\Dipo  
le=1.2336684,1.4942701,2.4894301\Quadrupole=24.174722,-36.6516242,12.4  
769022,-2.7673118,16.3576174,-3.0115202\PG=C01 [X(C67H80Au1I1N4Pd1)]\\

**TS2'**

1\1\GINC-OM103\FTS\RwB97XD\GenECP\C67H80Au1I1N4Pd1(2+)\WEIY\04-Apr-202  
0\0\\#p opt=(calcfc,ts,noeigen) geom=check wb97xd/genecp\\Title Card R  
equired\\2,1\Au,-1.1562906454,0.1831097655,0.2594977221\N,-0.740439026  
8,3.1750313257,0.8687959331\N,3.7637348679,0.5926696845,0.3560976062\N  
, -2.4757807596, -2.4520354409, 1.1113768876\C, -0.154619373, 1.9565580858,  
0.6027927785\C, 1.2037198953, 1.9186326234, 0.6450976941\C, 2.0231465467, 2  
.9915673423, 0.9956651745\C, 3.4444819648, 2.9476326184, 1.030146166\C, 4.1  
478710253, 4.0822705915, 1.4000721882\C, 3.4909908431, 5.2852484629, 1.7379  
185716\C, 2.1224909358, 5.3528130626, 1.6996761712\C, 1.365180564, 4.209097  
7978, 1.3223128902\C, -0.0295899199, 4.2474501937, 1.218825605\C, 4.1972695  
033, 1.748575592, 0.718432354\C, -2.0757957545, -1.6682261194, 0.0802677172  
\C, -2.895740272, -3.6845111189, 0.648200602\C, -2.7413772351, -2.057359665  
4, 2.4794233193\C, -4.0837236345, -1.810924404, 2.8203396932\C, -4.37081024  
66, -1.5717366762, 4.1638276351\C, -3.368068002, -1.5717483641, 5.124957616  
\C, -2.0490622026, -1.783282518, 4.7513818719\C, -1.7064952892, -2.03236304  
44, 3.421114215\C, -0.2582054947, -2.2483745478, 3.0439336459\C, 0.32499715  
65, -3.5064684715, 3.69635739\C, 0.5733930417, -1.0049052674, 3.3835721195\  
C, -5.1997276025, -1.726510829, 1.7903769806\C, -6.4211868466, -2.574144846  
5, 2.1647450093\C, -5.5831109083, -0.2567337494, 1.5668598624\H, 5.23361779  
53, 4.0506119505, 1.4379781406\H, 4.0766025386, 6.1504338723, 2.0267398302\  
H, 1.6071909442, 6.2736334827, 1.9563903181\H, -0.597111533, 5.1543114983, 1  
.3968841551\H, 5.2796155099, 1.830156948, 0.819992555\H, -3.2591501806, -4.  
4445656761, 1.3211815109\H, -5.3963201839, -1.3809062932, 4.463751637\H, -3  
.6168552565, -1.398235488, 6.1671778049\H, -1.2691345518, -1.7721339529, 5.  
5069502877\H, -0.199216212, -2.3921827893, 1.963056471\H, 0.3532717001, -3.  
419908399, 4.7882531497\H, 1.3468794315, -3.6739326697, 3.3421220407\H, -0.  
268431291, -4.3904351344, 3.4435351148\H, 0.1152172874, -0.0934560975, 2.97  
84562028\H, 1.577681255, -1.112207627, 2.9622021203\H, 0.6801652109, -0.868  
4833099, 4.4657312101\H, -4.8313604104, -2.1149487962, 0.8370987774\H, -6.1  
416007364, -3.616564422, 2.3467155795\H, -7.1523101831, -2.5544637318, 1.35  
02890062\H, -6.9224246993, -2.1988535164, 3.062752507\H, -5.9752476256, 0.1  
89875208, 2.4875684954\H, -6.360102058, -0.1783017995, 0.7986761783\H, -4.7  
192784833, 0.3369553666, 1.245186486\C, 4.7385282135, -0.4748210429, 0.2574  
462743\C, 5.330623464, -0.7620522751, -0.9806223348\C, 5.0525938999, -1.160  
3475513, 1.4456332604\C, 6.2708111804, -1.791454265, -1.0067767001\C, 6.008  
1757092, -2.1670808522, 1.3590280474\C, 6.6046016694, -2.4895208775, 0.1444



795947\H, 6.7501126452, -2.0477141591, -1.9463444922\H, 6.2881292927, -2.71  
80038902, 2.2502387374\H, 7.3375198609, -3.288384151, 0.0994291914\C, 4.403  
7924032, -0.8205657345, 2.7780134292\C, 5.2852199598, 0.1378025292, 3.59390  
39021\C, 4.0606575464, -2.0693871027, 3.5976373126\H, 3.4569426593, -0.3043  
801467, 2.5731268372\H, 5.4690397258, 1.0829077099, 3.0683033508\H, 4.81044  
21903, 0.3730332039, 4.5520142002\H, 6.2602567386, -0.3156293225, 3.8000497  
107\H, 3.5089035738, -2.7957996522, 2.9935071964\H, 4.9588513013, -2.558884  
6445, 3.9866014018\H, 3.4447529262, -1.7932100102, 4.4594473187\C, 4.997498  
5062, -0.0098350369, -2.2527973025\C, 4.290813174, -0.9203287085, -3.266271  
8832\C, 6.2380660818, 0.6554622771, -2.8639530914\H, 4.3017428324, 0.790745  
6571, -2.0013887423\H, 3.4308379501, -1.4223857354, -2.8132476582\H, 3.9423  
971219, -0.3315564741, -4.1218693709\H, 4.9693645159, -1.6937113562, -3.641  
7555786\H, 6.7342018508, 1.3178396911, -2.1459719567\H, 6.9731598068, -0.08  
49391982, -3.1951075542\H, 5.9517520454, 1.2490043783, -3.7385298861\C, -2.  
1703418197, 3.3584624999, 0.6649113804\C, -2.5827081313, 3.7461036853, -0.6  
16088211\C, -3.0187995617, 3.1835543418, 1.7609093594\C, -3.9490953975, 3.9  
748258736, -0.7775504977\C, -4.3783493011, 3.4008555828, 1.530330091\C, -4.  
8351763284, 3.7985941934, 0.2794418652\H, -4.328569245, 4.2797647873, -1.74  
77737291\H, -5.0844277781, 3.2779006584, 2.3457172117\H, -5.8945913649, 3.9  
775648151, 0.126536696\C, -2.5009824287, 2.833578727, 3.1459744791\C, -3.11  
21015757, 1.5328480102, 3.6685032855\C, -2.7331882319, 3.9983262793, 4.1192  
404406\H, -1.4190863029, 2.6668940825, 3.0842944485\H, -2.8959657573, 0.695  
5257654, 2.9976217877\H, -2.6994543318, 1.2893048647, 4.6515998205\H, -4.19  
93503336, 1.6075901757, 3.7728368074\H, -2.2756652681, 4.925801064, 3.75717  
92948\H, -3.8022748646, 4.1898072875, 4.2581099388\H, -2.30532618, 3.765151  
251, 5.099173226\C, -1.6193438591, 3.9021919328, -1.7852029886\C, -1.693373  
2376, 5.3107572261, -2.3892361038\C, -1.8569203036, 2.8240846708, -2.851148  
3036\H, -0.5940629433, 3.7599888978, -1.4245943575\H, -1.5170482669, 6.0825  
351991, -1.6326525961\H, -0.9403030096, 5.4225031928, -3.1757180033\H, -2.6  
716679015, 5.5045366113, -2.8405504643\H, -1.7322272745, 1.8152864385, -2.4  
426654445\H, -2.8657043545, 2.8955352548, -3.2708751605\H, -1.1398013843, 2  
.9450096733, -3.6687691823\C, -2.7887074578, -3.6563292282, -0.6982904961\  
H, -3.0382262921, -4.387430922, -1.4495355926\N, -2.2831181831, -2.41454914  
74, -1.033909791\C, -2.2825655966, -1.9271632002, -2.392823014\C, -3.293719  
113, -1.0189158702, -2.7516118081\C, -1.3762750522, -2.4651053881, -3.32302  
72022\C, -3.3063203672, -0.5595059846, -4.0699027947\C, -1.4623198873, -1.9  
980279192, -4.6365701073\C, -2.3994473459, -1.0394801103, -5.0034932857\H,  
-4.0713023126, 0.1451897328, -4.3814991158\H, -0.7933711082, -2.4026165729  
, -5.3889704734\H, -2.4455031966, -0.6933083077, -6.0315933662\C, -4.438011  
0096, -0.6395534213, -1.8237019865\C, -5.7442132381, -1.2811886108, -2.3142  
560848\C, -4.5799832141, 0.8707158643, -1.6497336791\H, -4.2363091619, -1.0  
476846106, -0.8322473823\H, -5.6384717851, -2.3659471445, -2.4171379156\H,  
-6.5520883432, -1.0832344257, -1.6014254954\H, -6.0487603206, -0.879420496  
7, -3.286510698\H, -3.6921227208, 1.2917200945, -1.168277612\H, -4.72158488

08,1.3870545675,-2.6051788063\H,-5.4416563186,1.1037860226,-1.01789174  
76\C,-0.4015829087,-3.5765320653,-2.9652356259\C,0.9488967706,-3.44054  
59126,-3.6801436313\C,-1.0244905978,-4.9730267267,-3.2496731538\H,-0.2  
009658849,-3.5024341749,-1.8932293809\H,1.3882232694,-2.4462900762,-3.  
5506300075\H,1.6528452779,-4.1687251071,-3.2666262359\H,0.8653186938,-  
3.6413465644,-4.7535162205\H,-1.1698149507,-5.5429621161,-2.3270448711  
\H,-1.989609812,-4.896720707,-3.7609638566\H,-0.3685922092,-5.56800552  
67,-3.8919502112\Pd,1.7836520615,0.1093225063,0.0829944942\I,1.9377269  
607,-2.5814561999,-0.0865465433\C,1.6699099717,0.9385338589,-1.7935715  
854\C,2.3021475005,2.1078714329,-2.1677275857\C,0.8990076498,0.1670275  
185,-2.6398690663\C,2.1793648985,2.507988763,-3.4999160856\H,2.8946961  
17,2.7040184557,-1.487038944\C,0.7946158077,0.5941343697,-3.9666969907  
\H,0.3990650172,-0.7406625163,-2.3256466961\C,1.4338545887,1.750362143  
, -4.3974094396\H,2.6778932906,3.4165144757,-3.8226460566\H,0.200280764  
8,-0.0047721041,-4.6474692695\H,1.3490421207,2.0634563432,-5.432692885  
3\\Version=ES64L-G16RevA.03\State=1-A\HF=-3225.431501\RMSD=4.632e-09\  
RMSF=1.501e-06\Dipole=1.18563,4.9294646,0.4447555\Quadrupole=26.523802  
8,-2.0853639,-24.4384389,22.3561999,0.8316627,9.7463732\PG=C01 [X(C67H  
80Au1I1N4Pd1)]\@

### Int3

1\1\GINC-OM115\FOpt\RwB97XD\GenECP\C69H83Au1I1N5Pd1(2+)\WEIY\25-Aug-20  
19\0\#p wb97xd/genecp opt\\Title Card Required\\2,1\Au,0.4428526549,0  
.0426989958,-0.0999570844\N,0.0028596788,0.4873863727,2.9215658836\N,5  
.0906217965,-0.5149721215,1.9213176199\N,4.5580607632,-2.81847413,0.11  
1582975\N,-0.2217801312,-0.8615031767,-3.0570665053\C,0.9024484573,0.0  
838371203,1.943292581\C,2.2188514309,-0.1722948033,2.3102693398\C,2.69  
50566406,0.2865676701,3.5652876151\C,4.0748402519,0.377512746,3.947943  
4293\C,4.4203747492,0.8507789055,5.1996342828\C,3.456636771,1.22999503  
57,6.1584026904\C,2.13523649,1.1873753153,5.8189775545\C,1.7476858172,  
0.7546698779,4.5189162099\C,0.4049792853,0.7538601201,4.1639224407\C,5  
.1771601626,0.0688389544,3.0568302244\C,-0.0116363952,0.1699311939,-2.  
1944104015\C,-0.5959721817,-0.4056573112,-4.3037733155\C,-0.2970243659  
, -2.2809017536,-2.819911785\C,-1.5298292797,-2.7928649184,-2.401817972  
2\C,-1.6245441099,-4.1790119268,-2.2604896302\C,-0.5531030946,-5.00024  
31178,-2.5839566266\C,0.6421226362,-4.4553929857,-3.0423351747\C,0.805  
3677587,-3.0765771831,-3.1593529041\C,2.1248881376,-2.4636648988,-3.60  
73073356\C,2.1748385416,-2.2462571286,-5.128536515\C,3.3334980397,-3.3  
013576167,-3.1733903751\C,-2.7414670371,-1.9073808603,-2.1562786764\C,  
-3.8903472787,-2.2668317497,-3.1077764107\C,-3.1842809166,-1.953455927  
8,-0.6937757841\C,5.3022401868,-3.5021943686,-0.4411497759\C,6.2572259  
51,-4.3492586366,-1.1363021883\H,5.4725369479,0.9365556847,5.457885219  
5\H,3.7729344565,1.5699872465,7.1377052759\H,1.3679857423,1.4989372502  
,6.5218581715\H,-0.3730153275,0.9683141289,4.8829970427\H,6.1714242461

, 0.3546717984, 3.405270666\H, -0.846221587, -1.0907239378, -5.0971583008\H  
, -2.5570219443, -4.6219328044, -1.9233558676\H, -0.6518938642, -6.07699538  
98, -2.4892531128\H, 1.4640195593, -5.1180484075, -3.290811321\H, 2.2145477  
933, -1.4848170518, -3.1177970657\H, 2.0034104175, -3.1908547021, -5.655833  
506\H, 3.1592414728, -1.8676931845, -5.4233608545\H, 1.4291542588, -1.52487  
52181, -5.4713393152\H, 3.2426222425, -3.6074951312, -2.1280759779\H, 4.249  
5418388, -2.7111885642, -3.2910401769\H, 3.4421319857, -4.1990118828, -3.79  
23687479\H, -2.4632115965, -0.8703670288, -2.3665366108\H, -3.5708504759, -  
2.2177983013, -4.1536071025\H, -4.7250858267, -1.5712085301, -2.9722925504  
\H, -4.265876754, -3.2780616102, -2.9195518948\H, -3.4601049338, -2.9684373  
39, -0.3868126067\H, -4.054507765, -1.30829666, -0.535113432\H, -2.38588198  
39, -1.6021328101, -0.0325655307\H, 6.9355686171, -4.8003237323, -0.4071043  
37\H, 6.8369529575, -3.739316434, -1.8335553273\H, 5.7290108387, -5.1342451  
951, -1.6833927155\C, 6.3206233073, -0.8378501117, 1.2400935671\C, 6.603584  
989, -0.1960583693, 0.0250752701\C, 7.142117259, -1.846516576, 1.7756510376  
\C, 7.7550493007, -0.5813133238, -0.6600059029\C, 8.2920552154, -2.17997644  
54, 1.0560068502\C, 8.5974522204, -1.5617569457, -0.1495172602\H, 8.0053587  
223, -0.0981393114, -1.5996376072\H, 8.9636879672, -2.9373642491, 1.4492471  
559\H, 9.4994601642, -1.8364366551, -0.6873648069\C, 6.8302615216, -2.59197  
59606, 3.0675813051\C, 7.8188831221, -2.2011736169, 4.1766453604\C, 6.81082  
33745, -4.1139603067, 2.8675177187\H, 5.825208735, -2.3167563175, 3.4020374  
68\H, 7.8289231712, -1.1192712162, 4.3514967982\H, 7.5578928651, -2.6976358  
234, 5.1166505547\H, 8.8401894079, -2.4965249284, 3.9139742193\H, 6.0746736  
874, -4.4047575131, 2.1110681765\H, 7.7909279791, -4.5010767362, 2.56975334  
33\H, 6.537364149, -4.6091474163, 3.8044476959\C, 5.6908089305, 0.873221579  
, -0.5497109527\C, 4.880180038, 0.3226988259, -1.7338442746\C, 6.4518722958  
, 2.1439138217, -0.9479107864\H, 4.9897010028, 1.1604620598, 0.2392422842\H  
, 4.2561192713, -0.5297661626, -1.4386794356\H, 4.2253025218, 1.0992934955,  
-2.1437384391\H, 5.5463199805, -0.0107753679, -2.5376617674\H, 7.058522058  
4, 2.5215972704, -0.1190146161\H, 7.1175373265, 1.9730777946, -1.8002742131  
\H, 5.7436475272, 2.9263632949, -1.2416256052\C, -1.4514308694, 0.440072062  
9, 2.7233876398\C, -2.2176574436, 1.6217980295, 2.7701001625\C, -2.03103684  
76, -0.844829919, 2.6825059088\C, -3.5929401496, 1.4790116202, 2.5680221031  
\C, -3.4081891037, -0.9136312656, 2.476361636\C, -4.1785606275, 0.236309452  
7, 2.3826443205\H, -4.2236918002, 2.3610679089, 2.5791182493\H, -3.89000049  
02, -1.8827877177, 2.4154603544\H, -5.2492924014, 0.1600845354, 2.222336536  
1\C, -1.2610079781, -2.1013943946, 3.0739434362\C, -1.7733706862, -3.390346  
2089, 2.4260288379\C, -1.3013567541, -2.2459267766, 4.6071795991\H, -0.2158  
544036, -1.9903614402, 2.7794641455\H, -1.8237512943, -3.3116271473, 1.3376  
711014\H, -1.0921087616, -4.2106841268, 2.6708044463\H, -2.7636502629, -3.6  
70591187, 2.8001286905\H, -0.8771787356, -1.3757383313, 5.1194909832\H, -2.  
3315359922, -2.368709704, 4.9577596036\H, -0.7283905351, -3.1258580739, 4.9  
164212955\C, -1.6896847668, 2.9909702241, 3.1915590609\C, -1.9784615132, 3.  
2194861285, 4.6898150865\C, -2.314756037, 4.1675466385, 2.4236053147\H, -0.

6064917122, 3.0215615718, 3.0336564788\H, -1.5710069937, 2.4400414425, 5.33  
9901965\H, -1.5586906305, 4.1776736752, 5.0121333553\H, -3.0582808099, 3.24  
66327601, 4.8682471562\H, -2.2829891295, 4.0435578953, 1.3383456076\H, -3.3  
602697439, 4.3202004797, 2.7084909205\H, -1.7833388185, 5.0898679268, 2.677  
2346967\C, -0.6009827346, 0.9381467248, -4.2391097786\H, -0.8602139763, 1.6  
925966401, -4.963891087\N, -0.2305762563, 1.2784811483, -2.9537650769\C, -0  
.3319791528, 2.6701419411, -2.5838731981\C, -1.6064388915, 3.1302057432, -2  
.2260656874\C, 0.7809941034, 3.5064099233, -2.763733874\C, -1.7339518795, 4  
.4935635251, -1.9535454417\C, 0.5902457515, 4.8606841448, -2.4930258358\C,  
-0.6474003065, 5.3467639704, -2.0838335835\H, -2.6995065843, 4.8970219574,  
-1.6654024772\H, 1.4170435848, 5.5529350407, -2.602797241\H, -0.76703758, 6  
.4069753082, -1.8831193572\C, -2.8157045583, 2.2050657801, -2.1566019922\C  
, -4.058590241, 2.8240299203, -2.80875627\C, -3.1200352491, 1.7696933984, -0  
.7197797594\H, -2.5847072708, 1.299447599, -2.7254281295\H, -3.8434357816,  
3.1853105213, -3.818930701\H, -4.8542402283, 2.0753328119, -2.8754066557\H  
, -4.4515364733, 3.6638936856, -2.2263440758\H, -2.2816014676, 1.2307949839  
, -0.2627998978\H, -3.3520989244, 2.6359052198, -0.0905528733\H, -3.9888168  
168, 1.1039191527, -0.6952329582\C, 2.1199120173, 2.9723731681, -3.26202692  
29\C, 3.3060982219, 3.87464228, -2.9061172473\C, 2.1242611973, 2.7599873491  
, -4.7874288533\H, 2.2768720705, 1.9972863524, -2.7804444063\H, 3.313272643  
4, 4.1511047879, -1.8500431706\H, 4.2419224473, 3.3542100899, -3.135614464\  
H, 3.3006085726, 4.7931384102, -3.5030044491\H, 1.4322067102, 1.9805896735,  
-5.1106137464\H, 1.8616315751, 3.6899646693, -5.3029982591\H, 3.1253484503  
, 2.4639121761, -5.1177289881\Pd, 3.3598550299, -1.3785156708, 1.1877068363  
\I, 1.1874851045, -2.6976016422, 0.2870820376\C, 1.0119228637, 2.0091704871  
, 0.1721912683\C, 0.1472233698, 3.0305487844, 0.5026124197\C, 2.3866150251,  
2.1946564316, 0.1586302887\C, 0.6757305802, 4.2832856868, 0.81450459\H, -0.  
9202062514, 2.8675998939, 0.5025152113\C, 2.9071011788, 3.4405698728, 0.497  
2542763\H, 3.0521851931, 1.3746508861, -0.0818177526\C, 2.050926158, 4.4884  
484049, 0.8259361172\H, -0.0000512798, 5.0989359363, 1.0491559326\H, 3.9839  
617011, 3.5857474693, 0.5004265962\H, 2.4546246855, 5.4622679104, 1.0832423  
837\\Version=ES64L-G09RevE.01\State=1-A\HF=-3225.458751\RMSD=5.613e-0  
9\RMSF=3.062e-06\Dipole=1.9796385, 0.4887269, 1.602682\Quadrupole=26.593  
963, -24.2651552, -2.3288079, -32.6203522, 11.4427137, 16.9902274\PG=C01 [X  
(C69H83Au1I1N5Pd1)]\@

### TS3

1\1\GINC-OM103\FTS\RwB97XD\GenECP\C67H80Au1I1N4Pd1 (2+)\WEIY\27-Mar-202  
0\0\#p opt=(calcf,ts,noeigen) wb97xd/genecp\Title Card Required\2,  
1\Au, 0.9502977195, -0.0914247815, 0.0602762313\N, 0.6686479788, 3.03418071  
77, 0.0398483904\N, -4.0503455657, 0.8624724122, -0.2984796552\N, 2.9111503  
431, -2.4859463499, -0.4250266545\C, -0.0346295251, 1.820118248, 0.11836171  
3\C, -1.3682599968, 1.8457566964, -0.3062537404\C, -2.0782977979, 3.0587921  
3, -0.4509260866\C, -3.5020192585, 3.1948941701, -0.5919911153\C, -4.065099

9465,4.4467352986,-0.7511830831\C,-3.2902557097,5.6255467595,-0.791750  
8569\C,-1.9389425475,5.5379059272,-0.6100667556\C,-1.3297557451,4.2683  
332075,-0.4122949664\C,0.0473319591,4.1760392503,-0.2435914872\C,-4.41  
77960767,2.0768025438,-0.4450113356\C,1.8254848158,-2.0050329488,0.221  
5973718\C,3.0966310348,-3.8274793363,-0.1451672663\C,3.8886840249,-1.7  
125663802,-1.1451678141\C,4.7446698016,-0.8924867003,-0.3923227064\C,5  
.7337206605,-0.1984835439,-1.0898105557\C,5.8853323824,-0.3555160314,-  
2.4619373109\C,5.0432228417,-1.203632682,-3.1695736879\C,4.0148869155,  
-1.8981713544,-2.5302966401\C,3.1157829875,-2.8383306544,-3.3190678084  
\C,3.8522266065,-4.1487744709,-3.6419605985\C,2.5934346968,-2.20458120  
05,-4.6151537012\C,4.6923981788,-0.8280894091,1.1272728443\C,5.8652231  
348,-1.6088838126,1.7362560807\C,4.6434638823,0.6100881166,1.644574599  
3\H,-5.1452027744,4.5311832099,-0.8349481085\H,-3.7725722164,6.5847950  
379,-0.939358082\H,-1.3179891207,6.4288941962,-0.6051757296\H,0.688591  
5354,5.0388387944,-0.3667128856\H,-5.4855285508,2.3004915507,-0.438133  
0634\H,3.9300152157,-4.3792189054,-0.5474141247\H,6.4194625866,0.44371  
08717,-0.5453164511\H,6.6791842727,0.1720338767,-2.9819395753\H,5.1852  
414308,-1.3252238199,-4.2384765072\H,2.2439497831,-3.0774436682,-2.698  
859213\H,4.7232847575,-3.9547488042,-4.2771690291\H,3.1895794211,-4.83  
48209138,-4.1788453691\H,4.2096859179,-4.6594687984,-2.742725101\H,2.1  
260521771,-1.2337464959,-4.4313567595\H,1.8475711261,-2.8615323779,-5.  
0734283985\H,3.394000756,-2.0615781855,-5.3484124428\H,3.7738119398,-1  
.3119695805,1.467197071\H,5.863752262,-2.6510684815,1.4005491551\H,5.7  
991483866,-1.6024459931,2.8296997757\H,6.8264648269,-1.1664985081,1.45  
33057784\H,5.5742410281,1.151077383,1.4469425286\H,4.4833458954,0.6159  
671294,2.7286331799\H,3.8306388097,1.1633496059,1.1638674175\C,-4.9928  
174642,-0.2139481672,-0.1740011682\C,-5.359277557,-0.6290439636,1.1196  
123373\C,-5.419374692,-0.86081376,-1.3466317924\C,-6.1920291819,-1.740  
7063634,1.2134716274\C,-6.2546528307,-1.9690730183,-1.1880658885\C,-6.  
6308195996,-2.4082044532,0.0727821073\H,-6.5151649913,-2.0928380914,2.  
1869264121\H,-6.6211828874,-2.4910351802,-2.0660260717\H,-7.28128554,-  
3.2712924357,0.1715275207\C,-5.0629027189,-0.3614411906,-2.741004373\C  
, -6.2614865523,0.3804970742,-3.3525342129\C,-4.5686102508,-1.477155578  
8,-3.6688959758\H,-4.2421113888,0.3633548305,-2.6610384834\H,-6.587530  
6523,1.2111486061,-2.7163034121\H,-6.0018578825,0.7825837935,-4.336845  
9639\H,-7.1150821572,-0.2943217248,-3.4765318055\H,-3.7066702126,-2.00  
10525185,-3.2425460007\H,-5.348787775,-2.2163132667,-3.8754071136\H,-4  
.259562984,-1.050671481,-4.6281032569\C,-4.9265216305,0.156914129,2.34  
86280185\C,-4.758226392,-0.7112275434,3.5985575415\C,-5.9256148004,1.2  
907853847,2.6352812546\H,-3.9516114802,0.6143996407,2.1313610668\H,-4.  
0581826842,-1.5333705694,3.4239203527\H,-4.3796164004,-0.1000830888,4.  
4245781536\H,-5.7095315274,-1.1340610136,3.936065308\H,-6.0294553321,1  
.976775427,1.7883201891\H,-6.9184912054,0.8805950102,2.8473753324\H,-5  
.6052505939,1.8749028834,3.5040912987\C,2.1347289844,3.1444880175,0.02

58266873\C,2.7893900125,3.827153488,1.0698888145\C,2.7764491659,2.7707  
377671,-1.168702952\C,4.1686787055,3.9940077129,0.9376741487\C,4.16111  
91545,2.9393497666,-1.2232651433\C,4.8523842232,3.5335660135,-0.178944  
7074\H,4.717377774,4.5038228065,1.7220903089\H,4.6965673495,2.64116016  
42,-2.1169791384\H,5.9263797891,3.6735593027,-0.2498288337\C,2.0151397  
855,2.4214693988,-2.4394553042\C,2.7012761146,1.3484327987,-3.28017143  
21\C,1.8068490045,3.7037831256,-3.2647163084\H,1.0251148823,2.03641759  
74,-2.1826940652\H,2.8939370134,0.4483732751,-2.692005511\H,2.05694379  
98,1.078375718,-4.1219977059\H,3.6530633666,1.6908436005,-3.6977706063  
\H,1.2689441896,4.4758997346,-2.7027854161\H,2.7676781443,4.1279081496  
, -3.5746866862\H,1.2262408078,3.4788308059,-4.16486242\C,2.0901088667,  
4.4522350855,2.2732085095\C,1.9151479649,5.9700569544,2.0841139867\C,2  
.8576459506,4.2100774885,3.5843670543\H,1.0964331559,4.0031165494,2.37  
72194539\H,1.2846249452,6.2276390702,1.227648131\H,1.4528797202,6.4060  
484595,2.9752672736\H,2.8850395951,6.4556285579,1.9357576316\H,3.22028  
16944,3.1816683871,3.6756603215\H,3.7275884801,4.8694143531,3.66330148  
86\H,2.2113003982,4.4300226005,4.4392905076\C,2.0936051326,-4.19535338  
87,0.6796934893\H,1.8657490332,-5.1348197026,1.1572800582\N,1.32726248  
65,-3.0651219074,0.8995896077\C,0.2993113814,-3.0211761066,1.906536797  
2\C,0.7127810432,-2.874755621,3.2381137023\C,-1.0361354974,-3.20991882  
51,1.5265021873\C,-0.2873579483,-2.8444037568,4.2116454312\C,-1.994077  
0188,-3.1843611586,2.5400768971\C,-1.6241404749,-2.9935924895,3.867216  
3345\H,-0.0134893486,-2.7254424771,5.2555009939\H,-3.0395455381,-3.342  
0905606,2.2930475932\H,-2.3838336801,-2.9884376516,4.6435426606\C,2.18  
01126099,-2.819777451,3.6421516619\C,2.5172959957,-3.93053526,4.646879  
1446\C,2.5765740927,-1.4418849848,4.1761919046\H,2.7935562601,-3.00087  
81789,2.7547300493\H,2.2284429693,-4.9152287507,4.2658192248\H,3.59396  
86391,-3.9427743094,4.8432807455\H,2.0089755445,-3.7795963937,5.604927  
4228\H,2.4273457939,-0.6760822274,3.4106518857\H,1.9819311171,-1.16272  
07683,5.0530718136\H,3.6325844476,-1.4392904366,4.4679998143\C,-1.4094  
700389,-3.5407355453,0.0928274711\C,-2.7718618388,-2.9818531033,-0.314  
1208677\C,-1.3724290288,-5.0607629192,-0.1326472669\H,-0.6627978921,-3  
.0885535072,-0.5670386179\H,-2.8700448643,-1.9291959498,-0.0074465402\  
H,-2.900741941,-3.0517407719,-1.3978866796\H,-3.6112930187,-3.51109642  
38,0.1485896412\H,-0.3795796328,-5.4738538553,0.0689391625\H,-2.088087  
7365,-5.5680721629,0.5233027678\H,-1.6295836451,-5.2978568741,-1.17004  
62491\pd,-2.2332727023,0.1681553075,-0.8660499844\C,0.2222545519,0.904  
0080159,1.8402327456\C,1.157457638,1.4442024817,2.7146108071\C,-0.9688  
401215,0.3526733293,2.3215552214\C,0.8663648926,1.4933617606,4.0769252  
883\H,2.1118968426,1.7966296043,2.3512545248\C,-1.2330079481,0.3887889  
479,3.6819887696\H,-1.6919762265,-0.0976759265,1.6493976018\C,-0.32660  
42969,0.9762629365,4.5630214321\H,1.5974019193,1.9137043584,4.75896757  
87\H,-2.1532855893,-0.0482610186,4.0507278177\H,-0.5452034749,1.014821  
2411,5.6250365896\I,-0.3691698223,-0.7227465834,-2.5580221928\\Version

=ES64L-G16RevA.03\State=1-A\HF=-3225.440266\RMSD=4.713e-09\RMSF=4.381  
e-07\Dipole=-1.4259673,3.1614844,1.5075478\Quadrupole=32.236482,8.6606  
998,-40.8971818,-7.1231918,-1.1541206,-1.605615\PG=C01 [X(C67H80Au1I1N  
4Pd1)]\@

#### Int4

1\1\GINC-LOCALHOST\FOpt\Rwb97XD\GenECP\C42H47N3Pd1(2+)\YIN\11-Apr-2020\  
0\#\#p wB97xd/genecp opt\Title Card Required\2,1\N,-0.3789268136,-0.36  
78509472,-0.2058553168\N,0.1989215315,0.0181601708,5.0269770985\C,0.50  
73283324,-0.2440722718,0.8534939476\C,0.0453108682,-0.0452116141,2.142  
6439015\C,-1.3379108292,-0.0164714488,2.414281255\C,-1.8946161543,0.08  
06476389,3.7254900532\C,-3.2787505691,0.1352341175,3.8741267863\C,-4.1  
528184993,0.0961767429,2.7662094044\C,-3.6427904606,-0.0257081718,1.49  
36491743\C,-2.23450984,-0.0989533838,1.2986741451\C,-1.6962087792,-0.2  
68431418,0.0128432336\C,-1.086324542,0.0808007328,4.9333120486\H,-3.70  
3075204,0.2060478708,4.8721419855\H,-5.2242879956,0.1498649733,2.92676  
81282\H,-4.3042866966,-0.0738133347,0.6333400636\H,-2.3265600834,-0.33  
68857184,-0.865558387\H,-1.6446483623,0.121496565,5.8699602795\C,0.77  
746941,0.0248888226,6.356329013\C,0.9544114393,1.2602296214,7.01711360  
35\C,1.1459403395,-1.216637498,6.9222773049\C,1.4909824599,1.215149302  
9,8.3106457158\C,1.6754876969,-1.1934491675,8.2168730925\C,1.843456435  
3,0.0070362616,8.9074786259\H,1.6256405916,2.1408524109,8.8617870115\H  
,1.9473054415,-2.1265719696,8.6996344324\H,2.2426884333,-0.0014926916,  
9.9176285473\C,0.9273691685,-2.5382821905,6.1899306018\C,-0.3880621551  
, -3.2046253235,6.6472844283\C,2.1102492715,-3.5121474576,6.3375952937\  
H,0.829141765,-2.3167703835,5.1192785408\H,-1.254191408,-2.5512090346,  
6.4877743186\H,-0.559360442,-4.1353460057,6.0954894338\H,-0.3530425175  
, -3.4470790976,7.7149651034\H,3.0544181568,-3.0489092061,6.0294884934\  
H,2.2268627551,-3.8672621748,7.3666321993\H,1.9464996411,-4.3948932627  
,5.710490934\C,0.5873539258,2.6066736027,6.3957375866\C,1.7833436324,3  
.5794162568,6.3821407303\C,-0.6254994365,3.2399568255,7.1088688593\H,0  
.3043486527,2.4402602356,5.3500552295\H,2.6437583474,3.1480118595,5.85  
7718395\H,1.5063620869,4.50878244,5.8730075864\H,2.104356477,3.8455133  
673,7.3945763451\H,-1.503124321,2.5833648147,7.0820953804\H,-0.4042430  
941,3.4461024257,8.161545597\H,-0.8959758953,4.1885680579,6.6327688709  
\C,0.0740658445,-0.5883527679,-1.5917221397\C,0.5354807517,0.525499554  
, -2.3211280414\C,-0.0366439164,-1.8925496715,-2.120369195\C,0.91933097  
4,0.2856582086,-3.6469312217\C,0.3623702056,-2.0579227951,-3.452625831  
9\C,0.8372776456,-0.9867028134,-4.2056002553\H,1.2738109237,1.11187218  
04,-4.2545127426\H,0.294313496,-3.0397101355,-3.9095421518\H,1.1361537  
934,-1.1434745082,-5.2376174713\C,-0.5891499648,-3.0874086147,-1.34018  
84676\C,0.3293834242,-4.3238945997,-1.4147317243\C,-2.0080188277,-3.45  
1537933,-1.8293101865\H,-0.6642812907,-2.8118150073,-0.2804436485\H,1.  
3468638386,-4.1068379863,-1.0706029276\H,-0.073302143,-5.1232142606,-0

.7841977155\H,0.4012196171,-4.7176905902,-2.4332756762\H,-2.7029669532  
, -2.6076139877, -1.7495815614\H, -1.9921465182, -3.7621892515, -2.87921465  
54\H, -2.4130506822, -4.2809896141, -1.2401319946\C, 0.570716551, 1.9488990  
718, -1.7681864805\C, -0.5354039502, 2.8102148368, -2.4149174486\C, 1.95286  
16214, 2.6086092765, -1.9402195006\H, 0.3619501772, 1.9145298757, -0.691943  
546\H, -1.5306425026, 2.3790723785, -2.2572141837\H, -0.5299055785, 3.81851  
11558, -1.987481013\H, -0.3828934515, 2.9036386542, -3.4952469762\H, 2.7493  
064775, 2.0043003874, -1.4922621059\H, 2.2016240158, 2.7586564549, -2.99552  
95978\H, 1.9579975923, 3.5945155697, -1.4632446691\Pd, 1.5343035823, 0.0883  
67901, 3.4376068701\C, 1.9820881471, -0.3040088605, 0.7172250502\C, 2.71010  
13265, 0.7069542046, 1.4141926719\C, 2.6839140563, -1.3485747645, 0.0986610  
163\C, 4.1185750336, 0.6479659815, 1.4680853116\H, 2.2148698492, 1.64594999  
78, 1.6645592774\C, 4.0757992811, -1.3815647167, 0.1597366549\H, 2.14938818  
36, -2.136046241, -0.4171750471\C, 4.7964641774, -0.3948654442, 0.850353489  
8\H, 4.6638925486, 1.4447082573, 1.9639946007\H, 4.6087196443, -2.190934049  
8, -0.3304305626\H, 5.8807176949, -0.4372104787, 0.878391477\N, 3.322193976  
, 0.172433897, 4.683093656\C, 4.230189529, 0.1789153421, 5.3998786198\C, 5.3  
576018975, 0.1850264619, 6.3228410815\H, 6.0613128954, -0.6117146614, 6.061  
7783795\H, 5.8748663572, 1.1486717057, 6.2774461503\H, 4.9911643419, 0.0222  
764482, 7.3413112726\\Version=EM64L-G09RevA.01\State=1-A\HF=-1918.79805  
92\RMSD=7.704e-09\RMSF=1.843e-06\Dipole=0.319898, -0.0104247, -0.0948211  
\Quadrupole=8.6623286, -47.7251889, 39.0628604, 1.9903189, 20.2838241, 12.0  
440682\PG=C01 [X(C42H47N3Pd1)]\@

### IAuL

1\1\GINC-OM103\FOpt\RwB97XD\GenECP\C27H36Au1I1N2\WEIY\11-Apr-2020\0\#\#  
p opt wb97xd/genecp\\Title Card Required\\0,1\Au,-1.8350304872,0.19504  
69665,-0.1057022988\N,-2.4381754462,-2.5597891966,1.0079754857\C,-2.21  
49623517,-1.7820127187,-0.0730279948\C,-2.6651917489,-3.8727465613,0.6  
373699587\C,-2.4295432225,-2.0615237123,2.3541857332\C,-3.6281301171,-  
1.5729792106,2.8871714243\C,-3.5883379581,-1.0760323746,4.1898400126\C  
, -2.4013705005, -1.0606449032, 4.911688139\C, -1.2252163351, -1.5331303324  
, 4.342699786\C, -1.2114111039, -2.0406605168, 3.0436345445\C, 0.0888594712  
, -2.5008039491, 2.4050817472\C, 0.7427051633, -3.6336495959, 3.2063118246\  
C, 1.0491313623, -1.3186437813, 2.2130134313\C, -4.9160387506, -1.532410548  
2, 2.081233302\C, -6.0356793756, -2.3276300405, 2.7645321923\C, -5.34058842  
9, -0.0831198271, 1.8058993621\H, -2.8626459792, -4.6416468161, 1.366623578  
8\H, -4.4946492601, -0.6807653077, 4.6392950504\H, -2.3897001193, -0.662570  
3267, 5.9218045218\H, -0.3003458755, -1.4919002379, 4.9106553161\H, -0.1384  
324684, -2.8952029538, 1.409396586\H, 1.0373079646, -3.298458228, 4.2070898  
189\H, 1.6455400539, -3.9862273016, 2.6959830329\H, 0.060888709, -4.4828833  
024, 3.3238352135\H, 0.5848000787, -0.5235778931, 1.6203514619\H, 1.9567689  
765, -1.6486961184, 1.6954350882\H, 1.346870206, -0.8894259547, 3.176399944  
6\H, -4.7283027308, -2.0022018975, 1.110352731\H, -5.7359627316, -3.3665377



048,2.9398925675\H,-6.934571825,-2.3305789699,2.1385621234\H,-6.306399  
2577,-1.8884573949,3.7312674771\H,-5.5785122359,0.4438815423,2.7368505  
365\H,-6.2327304957,-0.0645204285,1.1700281163\H,-4.5450856432,0.47301  
4054,1.299149161\C,-2.5803534003,-3.911469853,-0.7136929948\H,-2.68781  
08634,-4.7214128461,-1.4168637463\N,-2.3040213271,-2.6209880797,-1.127  
297111\C,-2.1252911181,-2.2003166555,-2.4880822501\C,-3.2460588417,-1.  
7473468574,-3.1938166118\C,-0.8304114905,-2.2143834937,-3.0197738723\C  
, -3.0418285318,-1.3252340884,-4.5074334422\C,-0.6797746378,-1.78170645  
41,-4.3371440893\C,-1.7738146626,-1.3466428745,-5.074785567\H,-3.88337  
54295,-0.9594977646,-5.0885340871\H,0.309033967,-1.7695225371,-4.78632  
84551\H,-1.6344510491,-1.0066834871,-6.0965191934\C,-4.6245304038,-1.6  
656252736,-2.5589618308\C,-5.6529080161,-2.5018672314,-3.3309762662\C,  
-5.0746996273,-0.2045089365,-2.4211709106\H,-4.5615108219,-2.079225677  
1,-1.5472660826\H,-5.3374970461,-3.5479998683,-3.4086361897\H,-6.62300  
79483,-2.4725176352,-2.8231400146\H,-5.7990250182,-2.1188265927,-4.347  
1768678\H,-4.3468086898,0.3819589103,-1.8509609557\H,-5.1921318213,0.2  
682989669,-3.4028394416\H,-6.0393749087,-0.1529725158,-1.9041212541\C,  
0.3781122894,-2.6326650285,-2.1983790261\C,1.3106924816,-1.4378530296,  
-1.9549443568\C,1.123390866,-3.8066180834,-2.8458410738\H,0.0265984983  
, -2.9708517626,-1.218239618\H,0.7784420552,-0.6122642347,-1.4711069158  
\H,2.1452950004,-1.7345702854,-1.3099429384\H,1.728100199,-1.062783439  
6,-2.8962656357\H,0.4588361788,-4.6637342549,-2.9994652295\H,1.5421684  
87,-3.5276085507,-3.8192245411\H,1.9539997447,-4.1262495193,-2.2072657  
074\I,-1.3361133011,2.7902115353,-0.1486568888\\Version=ES64L-G16RevA.  
03\State=1-A\HF=-1306.6869873\RMSD=8.058e-09\RMSF=1.886e-06\Dipole=-0.  
7946874,-4.1536057,0.0689736\Quadrupole=3.1767682,-15.9705584,12.79379  
01,-3.8144923,-0.4979262,0.5851339\PG=C01 [X(C27H36Au1I1N2)]\@
